## 12 **Abstract**

13 Mitochondrial immoderate fission induces neuronal apoptosis following focal cerebral  
14 ischemia-reperfusion (I/R) injury. With fewer complications, selective brain  
15 hypothermia (SBH) is considered an effective treatment against neuronal injury after  
16 stroke. However, the specific mechanism by which SBH influences mitochondrial  
17 fission remains unknown. Mitochondrial fission 1 protein (Fis1), a key factor of the  
18 mitochondrial fission system, regulates mitochondrial dynamics. This study aimed to  
19 investigate whether SBH regulates Fis1 expression in focal cerebral I/R injury. In this  
20 study, rat middle cerebral artery occlusion (MCAO) models were established. After 2  
21 h of occlusion, cold saline or normal saline was pumped into rats in different groups  
22 through the carotid artery, followed by restoration of blood perfusion. Cortical and  
23 rectal temperatures showed that the cold saline treatment achieved SBH. Cerebral I/R  
24 injury increased neurological deficit scores (NDS); neuronal apoptosis; Fis1 protein  
25 and mRNA expression; cytosolic cytochrome c (cyto-Cyto c) protein expression at 6,  
26 24 and 48 h postreperfusion; and cerebral infarct volumes at 24 h postreperfusion.  
27 Interestingly, SBH inhibited Fis1 protein and mRNA expression, blocked cyto-Cyto c  
28 protein expression, preserved neuronal cell integrity, and reduced neuronal apoptosis.  
29 However, normal saline treatment rarely resulted in positive outcomes. Based on  
30 these results, SBH inhibited Fis1 expression, thus ameliorating focal cerebral I/R  
31 injury in rats.

32

## 33 **Introduction**

34 Stroke is one of the leading causes of death and disability in the world [1-3]. Ischemic  
35 stroke caused by cerebral thrombosis or endovascular embolization accounts for a  
36 major portion of strokes. Early restoration of blood perfusion is the most effective  
37 treatment for stroke; this treatment provides nutrients and oxygen and removes toxic  
38 metabolites [4,5]. However, vessel recanalization often exacerbates the existing tissue  
39 damage [6,7]; thus, this condition is called cerebral ischemia-reperfusion (I/R) injury.  
40 Recent studies have suggested that morphological changes in mitochondria might be  
41 relevant to I/R injury [8,9]. Within the cell, mitochondria exist in an ever-changing  
42 dynamic state—constant fission and fusion—to form mitochondrial networks and  
43 maintain cellular physiological function and survival [10]. Notably, growing evidence  
44 has indicated that I/R injury can break this balance to induce neuronal apoptosis  
45 [11-13]. Mitochondrial fission protein 1 (Fis1), a 16-kDa protein anchored to the outer  
46 membrane of the mitochondria, mediates mitochondrial fission by recruiting  
47 cytoplasmic dynamin-related protein1 (Drp1) into the mitochondrial outer membrane  
48 [14]. Overexpression of Fis1 increases the frequency of mitochondrial fission,  
49 subsequently increasing the release of Cyto c and disrupting mitochondrial membrane  
50 potential, thus inducing neuronal apoptosis [15]. In addition, in cells with the Fis1  
51 deletion mutation, Drp1 is mostly localized to the cytoplasm, and mitochondrial  
52 fission is inhibited [16]. In conclusion, these studies indicate that Fis1 is a key factor  
53 regulating mitochondrial fission.

54 Hypothermia may be the most potent neuroprotective strategy that can affect multiple

55 pathways at various stages of ischemic stroke, such as calcium overload, oxidative  
56 stress, mitochondrial dysfunction, and apoptosis. According to our previous study,  
57 general hypothermia-induced neuroprotective effects against cerebral I/R injury are  
58 associated with suppressing mitochondrial fission by inhibiting the translocation of  
59 Drp1 from the cytoplasm to mitochondria in mice [17]. However, compared with  
60 general hypothermia, selective brain hypothermia (SBH) is strongly expected to  
61 become a novel attractive treatment for ischemic stroke due to its rapid cooling action  
62 and fewer systemic side effects [18,19]. Unfortunately, whether SBH could alleviate  
63 I/R injury by inhibiting Fis1 is not well known.

64 Therefore, in this study, we established a model of focal cerebral I/R using the  
65 intraluminal filament technique to embolize the middle cerebral artery (MCA) in rats.  
66 Moreover, we induced SBH by infusing cold saline through the internal carotid artery  
67 (ICA) in rats before reperfusion. In addition, we explored whether SBH could  
68 alleviate cerebral I/R injury by inhibiting Fis1 expression.

## 69 **Materials and methods**

### 70 **Experimental animals and groups**

71 A total of 160 healthy male Sprague-Dawley rats (SPF grade, weighing 200-250 g,  
72 aged 8-12 weeks) were provided by the Animal Company of Da Ren Fucheng  
73 (Qingdao, Shandong province, China) (license No: SCXKL [LU] 2014-007). All the  
74 experimental procedures were performed strictly in accordance with the relevant  
75 regulations of the Care and Use of Laboratory Animal from the National Institutes of  
76 Health. Experiments were authorized by the ethics committee of Qingdao Municipal

77 Hospital of China (approval No. 2019008). Animals were housed with five animals  
78 per cage with free access to water and food. The rats were kept in a room under  
79 standard laboratory conditions with a temperature of 18-24 °C, humidity of 50-60%,  
80 and a 12-hour light/dark cycle. The rats were randomly divided into 4 groups as  
81 follows (n=40 each group): sham group, I/R group, HT group (I/R+cold saline) and  
82 NT group (I/R+warm saline).

### 83 **Establishment of the focal cerebral I/R injury model**

84 Focal cerebral ischemia was induced by transient MCAO using the intraluminal  
85 filament technique as described in S1 Methods. The rectal temperature of the rats was  
86 maintained at 36.8-37.2 °C by a heating plate throughout the operation. After  
87 blocking the right MCA for 2 h, the filament was slowly pulled out to allow blood  
88 reperfusion. In the sham group, the carotid arteries were exposed without obstructing  
89 blood flow.

### 90 **Establishment of SBH**

91 According to previously used successful parameters [19], 4 °C cold saline was infused  
92 (20 ml/kg) through the microcatheter placed in the right ICA via the external carotid  
93 artery for 15 min immediately after removal of the filament in the HT group. To  
94 eliminate the interference from hemodilution by saline infusion, we performed 37 °C  
95 warm saline infusion in the same manner in the NT group. During saline infusion,  
96 cortical and rectal temperatures were monitored. Needle thermistor probes (BAT-12  
97 Microprobe Thermometer; Physitemp Instruments, Inc., NJ USA) were placed into

98 the cortex through holes made 3 mm lateral to bregma, 3 mm posterior to bregma, and  
99 3 mm lateral to bregma on the ipsilateral side. Body temperatures were measured  
100 through the rectum. Then, rats were returned to their cages with free access to food  
101 and water and were closely monitored.

## 102 **Evaluation of neurological deficits**

103 When rats' respiratory and heart rates were stable after reperfusion, we evaluated the  
104 neurological deficits of the rats using the Zea Longa 5-point scoring method [20].  
105 Scores ranging from 1 to 3 points were considered an indicator of the successful  
106 establishment of the MCAO model; rats with other scores were excluded. The  
107 excluded rats were replaced in subsequent experiments. At 6, 24 and 48 h  
108 postreperfusion, the rats in each group were evaluated for neurological deficits by the  
109 relevant index.

## 110 **Hematoxylin-eosin (HE) staining and terminal** 111 **deoxynucleotidyl transferase-mediated dUTP nick-end** 112 **labeling (TUNEL) staining**

113 At 6, 24 and 48 h postreperfusion, the rats were euthanized with pentobarbital sodium  
114 and transcardially perfused with 0.9% NaCl, followed by 4% paraformaldehyde  
115 (PFA). Brains were quickly removed, and brain tissues at the coronal plane from 1 to  
116 4 mm posterior to the optic chiasma were preserved. Then, the brains were soaked in  
117 10% paraformaldehyde phosphate buffer overnight, dehydrated, cleared, dipped in  
118 wax, embedded, and cut into 5- $\mu$ m-thick coronal paraffin sections. HE staining was

119 performed as follows: hematoxylin staining for 10 min, 75% hydrochloric acid  
120 alcohol solution for 30 seconds of decoloring, eosin staining for 10 min and 90%  
121 ethanol for 35 seconds of decoloring. Six visual fields were randomly selected and  
122 observed in the ischemic penumbra of each brain slice under a 400× magnification  
123 objective lens (Olympus, Tokyo, Japan). TUNEL staining was used to detect neuronal  
124 apoptosis. Briefly, paraffin sections were dewaxed, hydrated, and subjected to  
125 TUNEL staining. The specific steps were carried out according to the instructions of a  
126 TUNEL kit (Merck Millipore, USA). Five regions were randomly selected from the  
127 ischemic penumbra of each brain slice under a 400× magnification objective lens  
128 (Olympus, Tokyo, Japan). The mean values were calculated to determine the number  
129 of TUNEL-positive cells, which exhibited brownish yellow granules in the nucleus.

### 130 **Western blot analysis**

131 At 6, 24 and 48 h postreperfusion, brains were quickly removed, and ischemic  
132 penumbra cortices were rapidly dissected on ice as previously reported [21], the  
133 specific steps as described in S2 Methods. Mitochondrial and cytosolic fractions were  
134 separated using a cytosol/mitochondria fractionation kit (Beyotime Biotechnology,  
135 China) according to the manufacturer's instructions. The cytosol fraction was  
136 obtained at 4 °C for Cyto c assays. The expression of specific markers (Cox-IV for  
137 mitochondria) was used to ensure the purity of the cytosol fraction. The brain  
138 ischemic penumbra cortices were homogenized in lysis buffer (RIPA and PMSF) and  
139 then centrifuged at 12000 g for 15 min at 4 °C. The samples were used for Fis1  
140 assays.

141 The protein concentration was measured with a bicinchoninic acid (BCA) protein  
142 assay kit (Beyotime Biotechnology, China). Equal amounts of the protein samples  
143 (30~50  $\mu$ g) were loaded in each well of 10% sodium dodecyl sulfate-polyacrylamide  
144 gels, separated by electrophoresis, and transferred onto a polyvinylidene fluoride  
145 (PVDF) membrane by the semi-dry method. After washing with 1 $\times$  TBST and  
146 blocking with 3% BSA at room temperature for 2 h, the membranes were incubated  
147 overnight at 4  $^{\circ}$ C with the following primary antibodies: rabbit anti-rat Fis1  
148 monoclonal antibody (1:1000, Abcam, USA), rabbit anti-rat Cyto c monoclonal  
149 antibody (1:1000, Cell Signaling Technology, USA), rabbit anti-rat Cox-IV  
150 monoclonal antibody (1:2000, Abcam, USA) and rabbit anti-rat  $\beta$ -actin monoclonal  
151 antibody (1:5000, Zhongshan Goldenbridge Biotechnology, China). After washing  
152 primary antibodies with 1 $\times$  TBST, the membranes were incubated with goat  
153 anti-rabbit HRP-conjugated secondary antibody (1:5000, Zhongshan Goldenbridge  
154 Biotechnology, China) in blocking solution for 1 h at room temperature. The  
155 membranes were washed again, and the immunoreactive bands were developed using  
156 ECL (Beyotime Biotechnology, China). The images were quantified by ImageJ  
157 software (NIH, Maryland, USA), and the expression levels of Fis1 and cyto-Cyto c  
158 were reflected by the ratios of Fis1 and cyto-Cyto c to the  $\beta$ -actin band gray value,  
159 respectively.

## 160 **Quantitative reverse transcription-polymerase chain** 161 **reaction (qRT-PCR)**

162 At 6, 24 and 48 h postreperfusion, the ischemic penumbra cortices were rapidly



163 dissected on ice. Total RNA from the tissue samples was extracted using a TaKaRa  
164 MiniBEST Universal RNA Extraction Kit (TaKaRa, Japan) according to the  
165 manufacturer's instructions. For cDNA synthesis, 1 µg total RNA was reverse  
166 transcribed into cDNA using the PrimeScript™ RT reagent kit with gDNA Eraser  
167 (Perfect Real Time) (TaKaRa, Japan) according to the manufacturer's instructions.  
168 Real-time monitoring of the PCR amplification reaction was performed using an ABI  
169 7300 fast real time PCR system (CA, USA) and SYBR®Premix Ex Taq™ (Tli  
170 RNaseH Plus) (TaKaRa, Japan). The primers used were as follows: Fis1 mRNA  
171 (Forward: 5'-CTGGACTCATTGGACTGGCTGTG-3'; Reverse:  
172 5'-AGGAAGGCGGTGGTGAGGATG-3'); β-actin  
173 (Forward:5'-CACCCGCGAGTACAACCTTC-3'; Reverse:  
174 5'-CCCATACCCACCCATCACACC-3'). The relative quantitative value was  
175 determined using the  $2^{-\Delta\Delta C_t}$  method, and β-actin expression was used as an internal  
176 control.

### 177 **Infarct volume percentage analysis**

178 After 24 h of reperfusion, animals in each group were decapitated, and the brains were  
179 quickly removed, placed in a refrigerator at -20 °C for 20 min, sectioned into coronal  
180 slices of 2 mm thickness, and stained with 2,3,5-triphenyl-2H-tetrazolium chloride  
181 solution (TTC) (Amresco, Solong, CA, USA) at 37 °C for 30 min in the dark to  
182 evaluate the infarct area. Normal brain tissue was stained red, whereas infarcted tissue  
183 was stained pale gray. The sections were photographed and analyzed using ImageJ  
184 software (NIH, Maryland, USA). The cerebral infarct size was calculated as follows:  
185 (left hemisphere volume – right noninfarct volume)/left hemisphere volume×100%.

## 186 **Transmission electron microscopy**

187 After 24 h of reperfusion, the brains were perfusion-fixed with 2.5% glutaraldehyde.  
188 Coronal brain sections ( $1 \times 1 \times 1$  mm<sup>3</sup>) at the parietal lobe with cerebral ischemia were  
189 postfixed with 4% glutaraldehyde at 4 °C for 2 h. The sections were then rinsed in 0.2  
190 M PBS 3 times, soaked in 1% osmium tetroxide for 2 h, rinsed in 0.2 M PBS again,  
191 dehydrated in an ascending ethanol series to 100%, and embedded in epoxy resin. The  
192 sections were sectioned into 50 nm ultrathin sections with an ultramicrotome (Leica,  
193 UC6, Wetzlar, Germany) and placed on 200-mesh copper grids. Then, the ultrathin  
194 sections were stained with lead citrate followed by observation under an H-7650  
195 transmission electron microscope (Hitachi, Hiyoda, Tokyo).

## 196 **Statistical analysis**

197 All data are expressed as the mean $\pm$ standard deviation ( $\bar{x} \pm s$ ) and analyzed using  
198 SPSS 19.0 statistical software (IBM Corporation, Armonk, NY, USA). One-way  
199 analysis of variance (ANOVA) was used for comparison between different groups  
200 followed by LSD posttests.  $P < 0.05$  was considered statistically significant.

## 201 **Results**

### 202 **Perfusion of cold saline via the carotid artery selectively** 203 **reduced cortical temperature**

204 We first explored whether cold saline perfusion via the carotid artery induced SBH.  
205 Therefore, we continuously monitored cortical and rectal temperatures for 1 h after  
206 reperfusion. In the hypothermia (HT) group, cortical temperature rapidly dropped (Fig

207 1A, from  $34.39 \pm 0.23$  °C to  $32.22 \pm 0.09$  °C,  $P < 0.01$ ) during the infusion period and was  
208 maintained below 33.0 °C for at least 15 min after the infusion ended. However, no  
209 significant changes in cortical temperature were found in the normothermia (NT)  
210 group (Fig 1A, from  $34.55 \pm 0.30$  °C to  $34.81 \pm 0.44$  °C,  $P > 0.05$ ). Rectal temperature did  
211 not change during the observational period in either the HT group or the NT group  
212 (Fig 1B,  $P > 0.05$ ). These results suggested that cold saline treatment achieved SBH.

213 **Fig 1. The cortical and rectal temperatures in rats with focal cerebral I/R injury**  
214 **1 h after reperfusion.**

215 (A) Cortical temperature and (B) rectal temperature. One-way analysis of variance  
216 (ANOVA) was used to compare different groups followed by LSD posttests. Data are  
217 shown as the mean  $\pm$  SEM.  $**P < 0.01$  versus I/R group;  $##P < 0.01$  versus NT group.  
218 I/R: ischemia/reperfusion; HT: hypothermia; NT: normothermia, n = 10 each.

219 **SBH decreased neurological deficit scores (NDS) and**  
220 **cerebral infarct size**

221 In this study, the rat neurological examination was conducted using the Zea Longa  
222 5-point scoring method at 6, 24 and 48 h postreperfusion (Fig 2). The cerebral  
223 ischemia infarct size was determined by 2,3,5-triphenyl-2H-tetrazolium chloride  
224 solution (TTC) staining at 24 h after reperfusion (Fig 3A). Higher NDS and cerebral  
225 infarct size were observed in the I/R, HT and NT groups than in the sham group  
226 ( $P < 0.05$ ). After the cold saline treatment in the HT group, NDS and cerebral infarct  
227 size decreased ( $P < 0.05$ ). Interestingly, there was hardly any difference in NDS and

228 cerebral infarct size between the NT group and I/R group ( $P > 0.05$ ) (Figs 2 and 3B).

229 **Fig 2. Effects of SBH on NDS in rats with focal cerebral I/R injury.**

230 One-way analysis of variance (ANOVA) was used to compare different groups  
231 followed by LSD posttests. Data are shown as the mean  $\pm$  SD.  $*P < 0.05$  versus sham  
232 group;  $\#P < 0.05$  versus I/R group. I/R: ischemia/reperfusion; HT: hypothermia; NT:  
233 normothermia,  $n = 8$  each.

234 **Fig 3. Effects of SBH on infarct volume in rats with focal cerebral I/R injury.**

235 (A) Representative TTC-stained coronal brain sections. (B) Quantification of the  
236 percentage of cerebral infarct size among the four groups. One-way analysis of  
237 variance (ANOVA) was used to compare different groups followed by LSD posttests.  
238 Data are shown as the mean  $\pm$  SD.  $*P < 0.05$  versus sham group;  $\#P < 0.05$  versus I/R  
239 group. TTC: 2,3,5-triphenyl-2H-tetrazolium chloride solution; I/R:  
240 ischemia/reperfusion; HT: hypothermia; NT: normothermia,  $n = 5$  each.

241 **SBH alleviated histopathological changes and neuronal**  
242 **apoptosis in the cortical penumbra caused by I/R**

243 At 6, 24 and 48 h postreperfusion, hematoxylin-eosin (HE) staining showed that no  
244 abnormally morphological cells were detected in the sham group, while the other  
245 three groups showed shrunken cell bodies and nuclear pyknosis. By contrast, SBH  
246 markedly ameliorated pathological changes in the HT group compared with those in  
247 the I/R and NT groups (Fig 4A). Terminal deoxynucleotidyl transferase-mediated  
248 dUTP nick-end labeling (TUNEL) analysis was used to detect neuronal apoptosis. As

249 shown in Figs 4B and 4C, the proportion of TUNEL-positive cells showed an increase  
250 in neuronal apoptosis in the ischemic penumbra at 6, 24 and 48 h postreperfusion in  
251 the three injury groups compared to that in the sham group ( $P < 0.05$ ). Conversely, the  
252 proportion of TUNEL-positive cells in the HT group was lower than that in the I/R  
253 group at 6, 24 and 48 h postreperfusion ( $P < 0.05$ ). However, there were no obvious  
254 changes between the NT group and I/R group ( $P > 0.05$ ).

255 **Fig 4. Effects of SBH on ischemia-induced histopathological changes and**  
256 **neuronal apoptosis.**

257 (A) Representative pictures of HE staining in the cortical ischemic penumbra.  
258 Shrunken cell bodies and nuclear pyknosis (black arrows) were observed in the I/R,  
259 HT and NT groups but not in the sham group. The degree of histopathological  
260 changes in the HT group was slight less than that in the I/R group. (B) Representative  
261 pictures of TUNEL staining showed neuronal apoptosis in the cortical ischemic  
262 penumbra. TUNEL-positive nuclei with brownish yellow granules were considered  
263 apoptotic cells as indicated by black arrows. (C) Quantification of the percentage of  
264 TUNEL-positive cells among the four groups. Data are expressed as the mean  $\pm$  SD.  
265 \* $P < 0.05$  versus sham group; # $P < 0.05$  versus I/R group. Scale bars = 400  $\mu$ m, 400 $\times$   
266 visual field. I/R: ischemia/reperfusion; HT: hypothermia; NT: normothermia, n = 5  
267 each.

268 **SBH decreased the expression of Fis1 protein and mRNA in**  
269 **the ischemic penumbra caused by I/R**

270 The expression of Fis1 in the ischemic penumbra was measured by Western blot  
271 analysis, and the expression of Fis1 mRNA was measured by qRT-PCR. Parallel  
272 variation trends in the expression of Fis1 protein and mRNA were observed. The  
273 expression of Fis1 protein and mRNA was higher at 6, 24 and 48 h postreperfusion in  
274 the three injury groups than in the sham group ( $P < 0.05$ ). The expression of Fis1  
275 protein and mRNA at 6, 24 and 48 h postreperfusion declined following the infusion  
276 of cold saline in the HT group ( $P < 0.05$ ). However, there were hardly any changes in  
277 the expression of Fis1 protein and mRNA between the NT group and I/R group  
278 ( $P > 0.05$ ) (Figs 5B and 5C).

279 **Fig 5. Expression of Fis1 in the cortical ischemic penumbra following focal**  
280 **cerebral I/R injury in rats.**

281 (A) Western blotting was used to measure Fis1 protein from the cortical ischemic  
282 penumbra. Blots are representative of rats per group. (B) The relative quantities of  
283 Fis1 to  $\beta$ -actin. The results were normalized to the percentage of  $\beta$ -actin expression.  
284 (C) The expression of Fis1 mRNA from the cortical ischemic penumbra was  
285 determined by qRT-PCR. The relative quantities of Fis1 mRNA to  $\beta$ -actin. The  
286 results were normalized to the percentage of  $\beta$ -actin expression. One-way analysis of  
287 variance (ANOVA) was used to compare different groups followed by LSD posttests.  
288 Data are shown as the mean  $\pm$  SD. \* $P < 0.05$  versus sham group; # $P < 0.05$  versus I/R  
289 group. I/R: ischemia/reperfusion; HT: hypothermia; NT: normothermia,  $n = 5$  each.

290 **SBH reduced cyto-Cyto c expression in the ischemic**

## 291 **penumbra caused by I/R**

292 Cyto c is released from mitochondria to the cytosol during mitochondrial fission,  
293 which can induce neuronal apoptosis. Therefore, we analyzed the expression of  
294 cyto-Cyto c by Western blotting to determine the level of mitochondrial fission. As  
295 shown in Fig 6B, the expression of cyto-Cyto c was significantly increased at 6, 24  
296 and 48 h postreperfusion in the three injury groups compared to that in the sham  
297 group ( $P < 0.05$ ). By contrast, the expression of cyto-Cyto c at 6, 24 and 48 h  
298 postreperfusion declined following the infusion of cold saline in the HT group  
299 ( $P < 0.05$ ). However, no significant changes in the expression of cyto-Cyto c were  
300 found between the NT group and I/R group ( $P > 0.05$ ).

## 301 **Fig 6. Expression of cyto-Cyto c in the cortical ischemic penumbra following** 302 **focal cerebral I/R injury in rats.**

303 (A) Western blotting was used to measure cyto-Cyto c from the cortical ischemic  
304 penumbra. Blots are representative of rats per group. (B) The relative quantities of  
305 cyto-Cyto c to  $\beta$ -actin. The results were normalized to the percentage of  $\beta$ -actin  
306 expression. One-way analysis of variance (ANOVA) was used for comparison  
307 between different groups followed by LSD posttests. Data are shown as the mean  $\pm$   
308 SD. \* $P < 0.05$  versus sham group; # $P < 0.05$  versus I/R group. I/R:  
309 ischemia/reperfusion; HT: hypothermia; NT: normothermia, n = 5 each.

## 310 **Mitochondria ultrastructural alterations**

311 Transmission electron microscopy was used to detect the mitochondrial ultrastructure

312 of neurons at 24 h after reperfusion. The mitochondria were well arranged and  
313 exhibited a complete bilayer membrane structure and normal cristae without swelling  
314 and vacuolar degeneration in the sham group (Fig 7A). By contrast, mitochondrial  
315 morphology showed obvious alterations such as disappearance of the bilayer  
316 membrane structure, vacuolar degeneration and swelling and loss of cristae. These  
317 outcomes indicated that excessive mitochondrial fission occurred at 24 h after  
318 reperfusion in the I/R and NT groups (Figs 7B and 7D). However, these detrimental  
319 morphological changes were ameliorated, and mitochondria exhibited a less swollen  
320 and relatively intact membrane in the HT group (Fig 7C).

321 **Fig 7. Representative electron photomicrographs for mitochondrial shape and**  
322 **ultrastructure (black arrow) in the cortical ischemic penumbra.**

323 (A) shows many profiles of normal mitochondria in the sham group. (B) and (D)  
324 show a large number of mitochondria with swelling and disorganized cristae, as well  
325 as partial vacuolar degeneration in mitochondria in the I/R and NT groups. (C) shows  
326 slight mitochondrial swelling and disorganized cristae, which reflects mild  
327 mitochondrial damage after cold saline infusion in the HT group. Scale bars = 1  $\mu$ m.  
328 I/R: ischemia/reperfusion; HT: hypothermia; NT: normothermia, n = 5 each.

## 329 **Discussion**

330 Cerebral I/R injury is a common clinical pathophysiological phenomenon after  
331 restoring blood perfusion in stroke patients, which involves multiple pathogenesis [7].  
332 Mitochondria reportedly play an important role in the development of I/R injury,



333 which is involved in calcium homeostasis, oxidative phosphorylation, reactive oxygen  
334 species production, and apoptosis [13]. Recent studies have suggested that  
335 morphological changes in the mitochondria are relevant to I/R injury [8,22,23]. In  
336 stress, the balance of mitochondrial fission and fusion is lost, and fission prevails,  
337 which promotes fragmented mitochondria and induces mitochondrial dysfunction  
338 [24-26]. Moreover, in recent reports, excessive mitochondrial fission or fragmentation  
339 was observed during cerebral I/R injury [8,27,28]. In addition, Fis1, as one of the  
340 mitochondrial fission systems, plays an important role in the regulation of  
341 mitochondrial fission. Fis1 is exclusively localized to the mitochondrial outer  
342 membrane [14] and mediates mitochondrial fission by recruiting cytoplasmic Drp1. In  
343 our previous study, the expression of Drp1 in the mitochondrial outer membrane  
344 increased during cerebral I/R injury [21]. Based on this finding, we was speculated  
345 that the expression of Fis1 would increase accordingly during cerebral I/R injury. We  
346 examined Fis1 protein and mRNA in our study to test this hypothesis. Interestingly,  
347 some reports also confirmed our hypothesis by demonstrating that Fis1 expression  
348 increased following cerebral I/R injury [8,29].

349 Apoptosis is considered a vital component of the development of cerebral I/R injury  
350 [30]. Excessive mitochondrial fission promotes mitochondrial outer membrane  
351 permeability and increases Cyto c release, subsequently activating the apoptotic  
352 cascade reaction and eventually aggravating neurological damage [13,31]. Moreover,  
353 in a study by Wang et al. [32], adenoviral Fis1, which can induce Fis1 overexpression,  
354 increased mitochondrial fission and apoptosis, whereas Fis1 knockdown attenuated

355 mitochondrial fission and apoptosis. In addition, mitochondrial morphological  
356 alterations, cyto-Cyto c expression and neuronal apoptosis were observed in our  
357 experiment. Consistent with previous reports, our results further demonstrated that  
358 Fis1 overexpression increased mitochondrial fission, causing Cyto c release and  
359 apoptosis during cerebral I/R injury.

360 Notably, many studies have focused on the neuroprotection of hypothermia, one of  
361 the most robust neuroprotectants against ischemia stroke [33-36]. SBH is more  
362 suitable for neuroprotection after stroke because it can quickly reach the target  
363 temperature and avoid the adverse effects associated with general hypothermia  
364 [37,38]. Moreover, transarterial regional hypothermia, which can achieve SBH, may  
365 exert strong neuroprotective effects in the MCAO with transient collateral  
366 hypoperfusion model [19]. In the present study, we prepared a hypothermia model  
367 following MCAO by perfusing cold saline through the ICA, and the results of cortical  
368 and rectal temperatures showed that SBH models were successfully established. To  
369 eliminate interference from hemodilution by saline infusion, we performed 37 °C  
370 warm saline infusion in the same manner in the NT group. Our data demonstrated that  
371 the NDS and cerebral infarct volume percentage decreased after cold saline perfusion  
372 in the HT group. By contrast, there were hardly any differences in the results between  
373 the I/R group and NT group. These results showed that SBH can attenuate focal  
374 cerebral I/R injury.

375 However, the underlying mechanisms of hypothermia-induced neuroprotection are  
376 complex and remain unclear. Notably, morphological changes in the mitochondria are

377 a key step of cerebral I/R injury, and mitochondria are a target of  
378 hypothermia-induced neuroprotection. General hypothermia can attenuate  
379 mitochondrial oxidative stress and reduce mitochondrial membrane permeability  
380 [39,40]. In addition, in our previous study, general hypothermia reduced  
381 mitochondrial fission by inhibiting the translation of Drp1 from the cytoplasm to the  
382 mitochondrial outer membrane [17]. Drp1 is mainly localized to the cytoplasm, and  
383 mitochondrial fission is inhibited in cells with Fis1 deletion mutations [16]. However,  
384 whether SBH could inhibit mitochondrial fission and subsequently decrease neuronal  
385 apoptosis by inhibiting the expression of Fis1 has not been thoroughly studied.  
386 Therefore, in our study, we analyzed the expression levels of Fis1 protein and mRNA  
387 and cyto-Cyto c, as well as the ratio of neuronal apoptosis in the ischemic penumbra  
388 of the cerebral cortex in rats with focal cerebral I/R injury. Interestingly, the results  
389 clearly demonstrated that SBH inhibited the expression of Fis1 protein and mRNA  
390 and cyto-Cyto c, in addition to the ratio of neuronal apoptosis at 6, 24 and 48 h after  
391 reperfusion. Furthermore, mitochondrial ultrastructural analysis revealed that at 24 h  
392 after reperfusion, the level of mitochondrial fission was lower in the HT group than in  
393 the I/R group and NT group. Combined with our present research and a previous  
394 report [17], we hypothesized that SBH could down-regulate the expression of Fis1 in  
395 the mitochondrial outer membrane, inhibiting excessive mitochondrial fission induced  
396 by the binding of Drp1 to Fis1, reducing the cytosolic release of Cyto c and eventually  
397 ameliorating cellular apoptosis.  
398 Although the neuroprotective mechanisms of SBH against I/R injury have not been

399 fully examined in this work, our study demonstrated that SBH might play a  
400 neuroprotective role by regulating the expression of Fis1 to some extent. However,  
401 this study has some limitations. First, the precise mechanisms of SBH-induced  
402 neuroprotection by suppressing Fis1 remain unclear. We will implement Fis1  
403 overexpression and knockdown in vitro and vivo in our future study. Second, further  
404 studies are needed to investigate the changes in the degree of binding of Drp1 to Fis1  
405 after SBH.

406 In conclusion, SBH could ameliorate focal cerebral I/R injury through inhibiting Fis1  
407 expression and mitochondrial fission.

## 408 **Acknowledgments**

409 We would like to thank the teachers and students at Qingdao Municipal Hospital for  
410 their assistance.

## 411 **Author Contributions**

412 **Data curation:** Yanan Tang.

413 **Formal analysis:** Yanan Tang, Gaofeng Zhang.

414 **Investigation:** Yanan Tang, Gaofeng Zhang, Mingshan Wang.

415 **Methodology:** Yanan Tang, Gaofeng Zhang, Mingshan Wang

416 **Project administration:** Yanan Tang, Weiwei Qin, Huailong Chen.

417 **Resources:** Yanan Tang, Weiwei Qin, Xiaopeng Sun, Fei Shi, Lixin Sun.

418 **Software:** Yanan Tang, Xiaona Xu.

419 **Supervision:** Yanan Tang, Gaofeng Zhang, Mingshan Wang.

420 **Validation:** Yanan Tang, Gaofeng Zhang, Mingshan Wang.

421 **Writing – original draft:** Yanan Tang

422 **Writing – review& editing:** Yanan Tang, Gaofeng Zhang, Mingshan Wang.

423

424

## 425 **References**

- 426 1. Cuartero MI, de la Parra J, Garcia-Culebras A, Ballesteros I, Lizasoain I, Moro MA.  
427 The Kynurenine Pathway in the Acute and Chronic Phases of Cerebral Ischemia.  
428 Current pharmaceutical design. 2016;22(8):1060-73.
- 429 2. de Rooij NK, Rinkel GJ, Dankbaar JW, Frijns CJ. Delayed cerebral ischemia after  
430 subarachnoid hemorrhage: a systematic review of clinical, laboratory, and  
431 radiological predictors. Stroke. 2013;44(1):43-54. doi:  
432 10.1161/strokeaha.112.674291.
- 433 3. Xie W, Zhou P, Sun Y, Meng X, Dai Z, Sun G, et al. Protective Effects and Target  
434 Network Analysis of Ginsenoside Rg1 in Cerebral Ischemia and Reperfusion Injury:  
435 A Comprehensive Overview of Experimental Studies. Cells. 2018;7(12). doi:  
436 10.3390/cells7120270.
- 437 4. Kraft P, De Meyer SF, Kleinschnitz C. Next-generation antithrombotics in  
438 ischemic stroke: preclinical perspective on 'bleeding-free antithrombosis'. Journal  
439 of cerebral blood flow and metabolism : official journal of the International Society  
440 of Cerebral Blood Flow and Metabolism. 2012;32(10):1831-40. doi:  
441 10.1038/jcbfm.2012.108.
- 442 5. Vivien D, Gauberti M, Montagne A, Defer G, Touze E. Impact of tissue  
443 plasminogen activator on the neurovascular unit: from clinical data to experimental  
444 evidence. Journal of cerebral blood flow and metabolism : official journal of the  
445 International Society of Cerebral Blood Flow and Metabolism.  
446 2011;31(11):2119-34. doi: 10.1038/jcbfm.2011.127.

- 447 6. Eltzschig HK, Eckle T. Ischemia and reperfusion--from mechanism to translation.  
448 Nature medicine. 2011;17(11):1391-401. doi: 10.1038/nm.2507.
- 449 7. Kalogeris T, Baines CP, Krenz M, Korthuis RJ. Ischemia/Reperfusion. Compr  
450 Physiol. 2016;7(1):113-70. doi: 10.1002/cphy.c160006.
- 451 8. Anzell AR, Maizy R, Przyklenk K, Sanderson TH. Mitochondrial Quality Control  
452 and Disease: Insights into Ischemia-Reperfusion Injury. Mol Neurobiol.  
453 2018;55(3):2547-64. doi: 10.1007/s12035-017-0503-9.
- 454 9. Murphy MP, Hartley RC. Mitochondria as a therapeutic target for common  
455 pathologies. Nat Rev Drug Discov. 2018. doi: 10.1038/nrd.2018.174.
- 456 10. Suliman HB, Piantadosi CA. Mitochondrial Quality Control as a Therapeutic  
457 Target. Pharmacological reviews. 2016;68(1):20-48. doi: 10.1124/pr.115.011502.
- 458 11. Liu F, Lu J, Manaenko A, Tang J, Hu Q. Mitochondria in Ischemic Stroke: New  
459 Insight and Implications. Aging Dis. 2018;9(5):924-37. doi:  
460 10.14336/AD.2017.1126.
- 461 12. Sanchis-Gomar F, Derbre F. Mitochondrial fission and fusion in human diseases.  
462 The New England journal of medicine. 2014;370(11):1073-4. doi:  
463 10.1056/NEJMc1316254.
- 464 13. Yang JL, Mukda S, Chen SD. Diverse roles of mitochondria in ischemic stroke.  
465 Redox Biol. 2018;16:263-75. doi: 10.1016/j.redox.2018.03.002.
- 466 14. Loson OC, Song Z, Chen H, Chan DC. Fis1, Mff, MiD49, and MiD51 mediate  
467 Drp1 recruitment in mitochondrial fission. Mol Biol Cell. 2013;24(5):659-67. doi:  
468 10.1091/mbc.E12-10-0721.

- 469 15. Gomes LC, Scorrano L. High levels of Fis1, a pro-fission mitochondrial protein,  
470 trigger autophagy. *Biochim Biophys Acta*. 2008;1777(7-8):860-6. doi:  
471 10.1016/j.bbabi.2008.05.442.
- 472 16. A.D. Mozdy, J.M. McCaffery, Shaw JM. Dnm1p GTPase-mediated Mitochondrial  
473 Fission Is a Multi-step Process Requiring the Novel Integral Membrane  
474 Component Fis1p. *Cell Biology*. 2000;151(2):367–79. doi: 10.1083/jcb.151.2.367.
- 475 17. Tang Y, Liu X, Zhao J, Tan X, Liu B, Zhang G, et al. Hypothermia-induced  
476 ischemic tolerance is associated with Drp1 inhibition in cerebral  
477 ischemia-reperfusion injury of mice. *Brain Res*. 2016;1646(2):73-83. doi:  
478 10.1016/j.brainres.2016.05.042.
- 479 18. Dumitrascu OM, Lamb J, Lyden PD. Still cooling after all these years:  
480 Meta-analysis of pre-clinical trials of therapeutic hypothermia for acute ischemic  
481 stroke. *Journal of cerebral blood flow and metabolism : official journal of the*  
482 *International Society of Cerebral Blood Flow and Metabolism*.  
483 2016;36(7):1157-64. doi: 10.1177/0271678X16645112.
- 484 19. Kurisu K, Abumiya T, Ito M, Gekka M, Osanai T, Shichinohe H, et al.  
485 Transarterial regional hypothermia provides robust neuroprotection in a rat model  
486 of permanent middle cerebral artery occlusion with transient collateral  
487 hypoperfusion. *Brain Res*. 2016;1651(2016):95-103. doi:  
488 10.1016/j.brainres.2016.09.017.
- 489 20. Longa EZ, Weinstein PR, Carlson S, Cummins R. Reversible middle cerebral  
490 artery occlusion without craniectomy in rats. *Stroke*. 1989;20(1):84-91. doi:



- 491 10.1161/01.STR.20.1.84.
- 492 21. Zhang G, Sun L, Chen H, Wang M. Electroacupuncture preconditioning protects  
493 against focal cerebral ischemia reperfusion injury via suppression of  
494 dynamic-related protein 1. *neural regeneration research*. 2018;13(1):86-93. doi:  
495 10.4103/1673-5374.224373.
- 496 22. Li Y, Liu X. Novel insights into the role of mitochondrial fusion and fission in  
497 cardiomyocyte apoptosis induced by ischemia/reperfusion. *J Cell Physiol*. 2018.  
498 doi: 10.1002/jcp.26522.
- 499 23. Liu W, Tian F, Kurata T, Morimoto N, Abe K. Dynamic changes of mitochondrial  
500 fission proteins after transient cerebral ischemia in mice. *Brain Res*.  
501 2012;1456:94-9. doi: 10.1016/j.brainres.2012.03.038.
- 502 24. Calo L, Dong Y, Kumar R, Przyklenk K, Sanderson TH. Mitochondrial dynamics:  
503 an emerging paradigm in ischemia-reperfusion injury. *Current pharmaceutical*  
504 *design*. 2013;19(39):6848-57. doi: 10.2174/138161281939131127110701.
- 505 25. Kausar S, Wang F, Cui H. The Role of Mitochondria in Reactive Oxygen Species  
506 Generation and Its Implications for Neurodegenerative Diseases. *Cells*.  
507 2018;7(12). doi: 10.3390/cells7120274.
- 508 26. Twig G, Shirihai OS. The interplay between mitochondrial dynamics and  
509 mitophagy. *Antioxidants & redox signaling*. 2011;14(10):1939-51. doi:  
510 10.1089/ars.2010.3779.
- 511 27. Kim H, Scimia MC, Wilkinson D, Trelles RD, Wood MR, Bowtell D, et al.  
512 Fine-tuning of Drp1/Fis1 availability by AKAP121/Siah2 regulates mitochondrial

- 513 adaptation to hypoxia. *Mol Cell*. 2011;44(4):532-44. doi:  
514 10.1016/j.molcel.2011.08.045.
- 515 28. Tang J, Hu Z, Tan J, Yang S, Zeng L. Parkin Protects against Oxygen-Glucose  
516 Deprivation/Reperfusion Insult by Promoting Drp1 Degradation. *Oxidative  
517 medicine and cellular longevity*. 2016;2016:8474303. doi: 10.1155/2016/8474303.
- 518 29. Lu CJ, Guo YZ, Zhang Y, Yang L, Chang Y, Zhang JW, et al. Coenzyme Q10  
519 ameliorates cerebral ischemia reperfusion injury in hyperglycemic rats. *Pathol Res  
520 Pract*. 2017;213(9):1191-9. doi: 10.1016/j.prp.2017.06.005.
- 521 30. Radak D, Katsiki N, Resanovic I, Jovanovic A, Sudar-Milovanovic E, Zafirovic S,  
522 et al. Apoptosis and Acute Brain Ischemia in Ischemic Stroke. *Current vascular  
523 pharmacology*. 2017;15(2):115-22. doi: 10.2174/1570161115666161104095522.
- 524 31. MacDougall G, Anderton RS, Mastaglia FL, Knuckey NW, Meloni BP.  
525 Mitochondria and neuroprotection in stroke: Cationic arginine-rich peptides  
526 (CARPs) as a novel class of mitochondria-targeted neuroprotective therapeutics.  
527 *Neurobiol Dis*. 2018;121(18):17-33. doi: 10.1016/j.nbd.2018.09.010.
- 528 32. Wang K, Long B, Jiao J, Wang J, Liu J, Li Q, et al. miR-484 regulates  
529 mitochondrial network through targeting Fis1. *Nat Commun*. 2012;3:781. doi:  
530 10.1038/ncomms1770.
- 531 33. Andresen M, Gazmuri JT, Marin A, Regueira T, Rovegno M. Therapeutic  
532 hypothermia for acute brain injuries. *Scand J Trauma Resusc Emerg Med*.  
533 2015;23:42. doi: 10.1186/s13049-015-0121-3.
- 534 34. Kurisu K, Yenari MA. Therapeutic hypothermia for ischemic stroke;

- 535 pathophysiology and future promise. *Neuropharmacology*. 2017. doi:  
536 10.1016/j.neuropharm.2017.08.025.
- 537 35. Wu T-C, Grotta JC. Hypothermia for acute ischaemic stroke. *The Lancet*  
538 *Neurology*. 2013;12(3):275-84. doi: 10.1016/s1474-4422(13)70013-9.
- 539 36. Yenari MA, Han HS. Neuroprotective mechanisms of hypothermia in brain  
540 ischaemia. *Nat Rev Neurosci*. 2012;13(4):267-78. doi: 10.1038/nrn3174.
- 541 37. Chen J, Fredrickson V, Ding Y, Cheng H, Wang N, Ling F, et al. Enhanced  
542 neuroprotection by local intra-arterial infusion of human albumin solution and  
543 local hypothermia. *Stroke*. 2013;44(1):260-2. doi:  
544 10.1161/STROKEAHA.112.675462.
- 545 38. Esposito E, Ebner M, Ziemann U, Poli S. In cold blood: intraarterial cold infusions  
546 for selective brain cooling in stroke. *Journal of cerebral blood flow and*  
547 *metabolism : official journal of the International Society of Cerebral Blood Flow*  
548 *and Metabolism*. 2014;34(5):743-52. doi: 10.1038/jcbfm.2014.29.
- 549 39. Gong P, Li CS, Hua R, Zhao H, Tang ZR, Mei X, et al. Mild hypothermia  
550 attenuates mitochondrial oxidative stress by protecting respiratory enzymes and  
551 upregulating MnSOD in a pig model of cardiac arrest. *PloS one*.  
552 2012;7(4):e35313. doi: 10.1371/journal.pone.0035313.
- 553 40. Gong P, Hua R, Zhang Y, Zhao H, Tang Z, Mei X, et al. Hypothermia-induced  
554 neuroprotection is associated with reduced mitochondrial membrane permeability  
555 in a swine model of cardiac arrest. *Journal of cerebral blood flow and metabolism :*  
556 *official journal of the International Society of Cerebral Blood Flow and*

557 Metabolism. 2013;33(6):928-34. doi: 10.1038/jcbfm.2013.33.

558

559 **Supporting information**

560 **S1 Methods. Establishment of the focal cerebral I/R injury model.**

561 (DOCX)

562 **S2 Methods. Steps for isolating cortical ischemic penumbra.**

563 (DOCX)

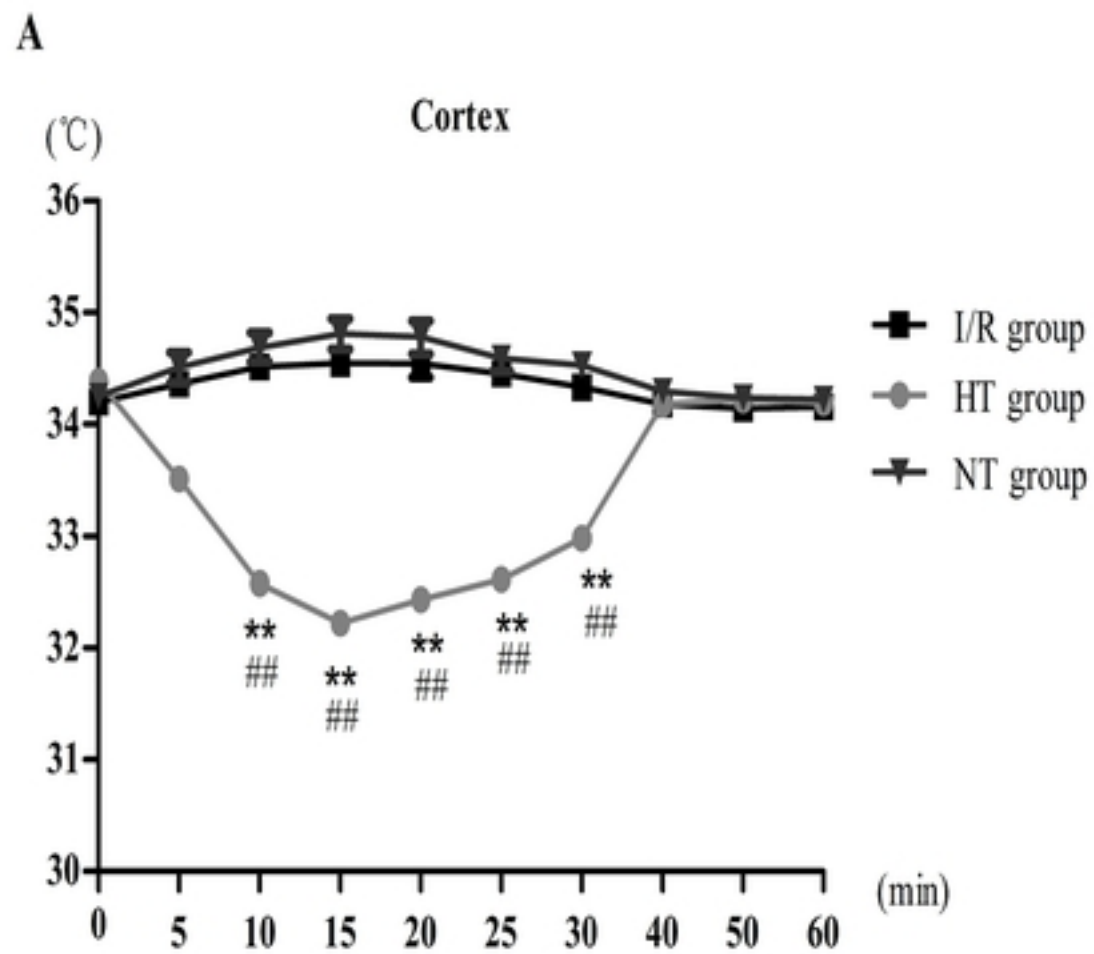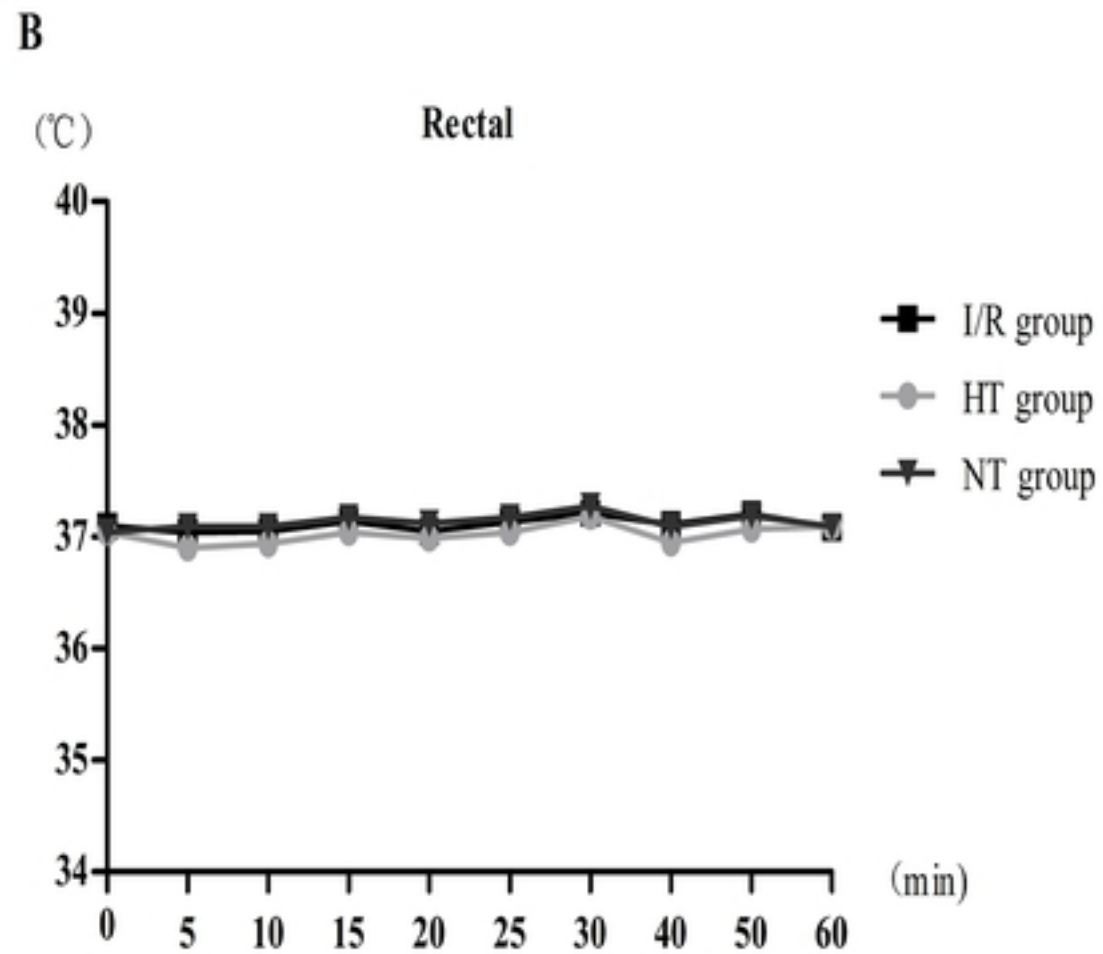

Figure

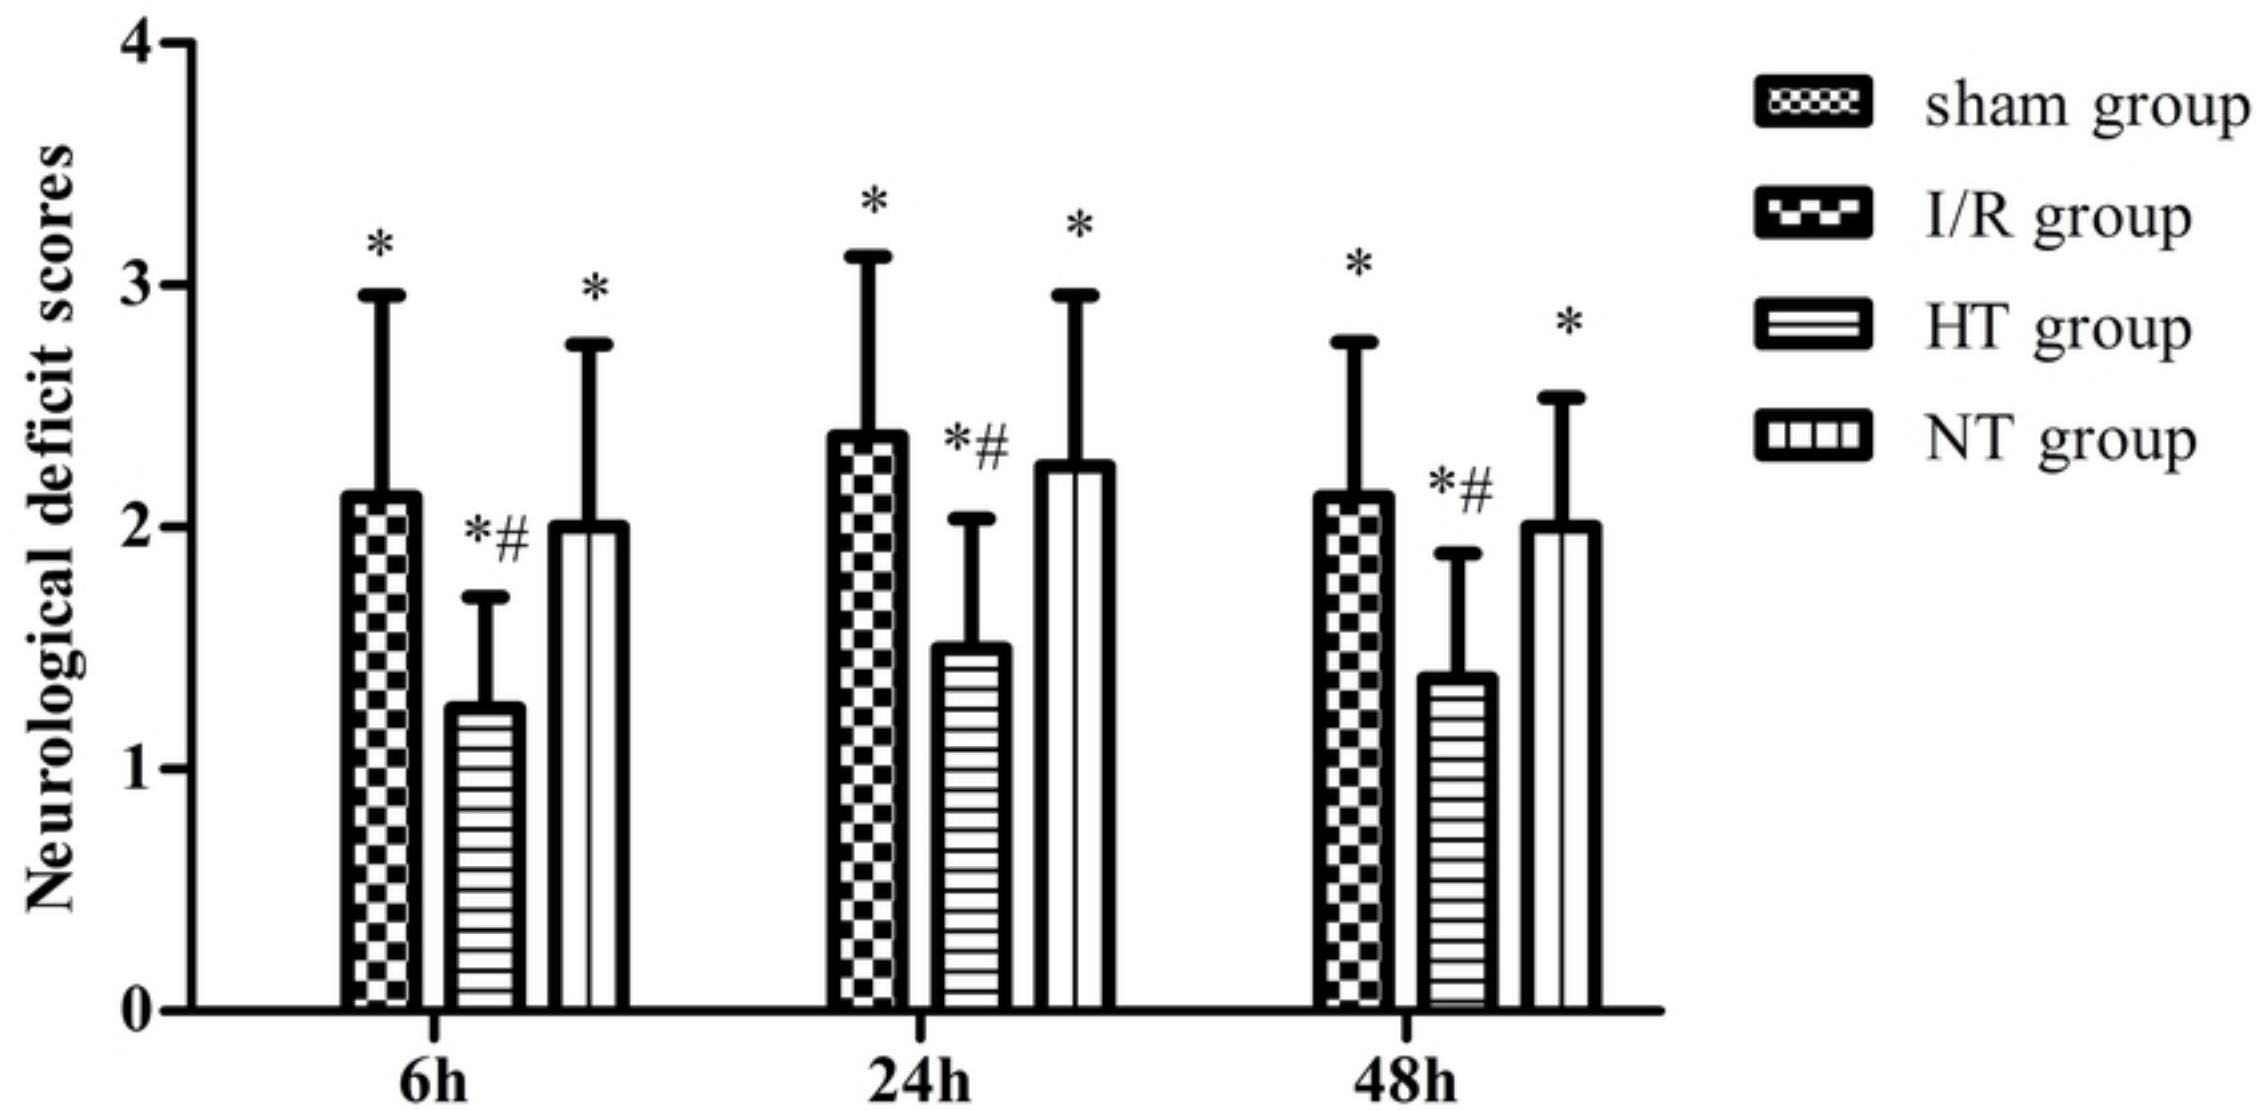

Figure

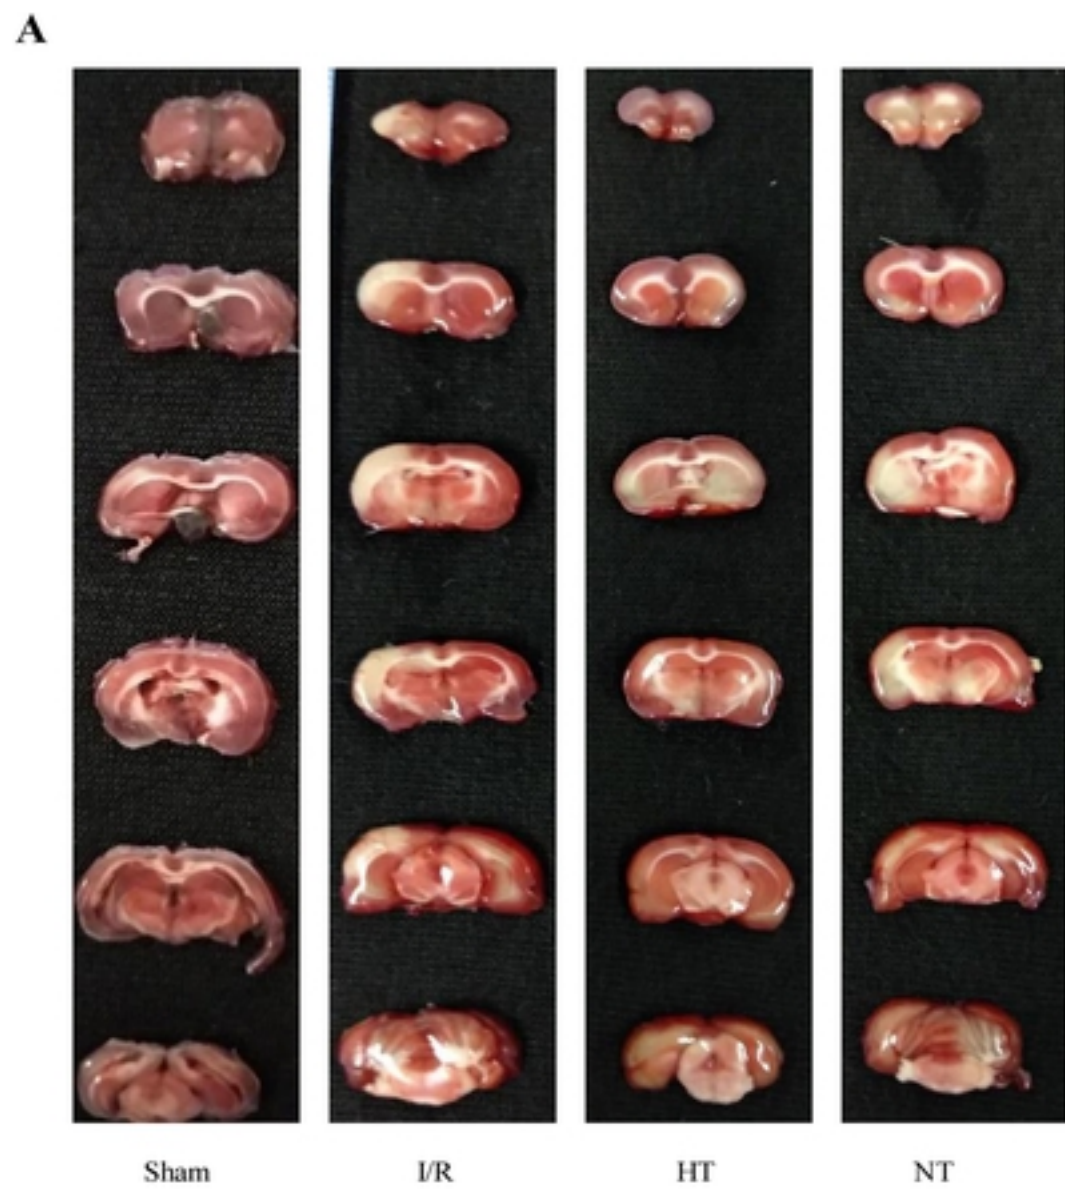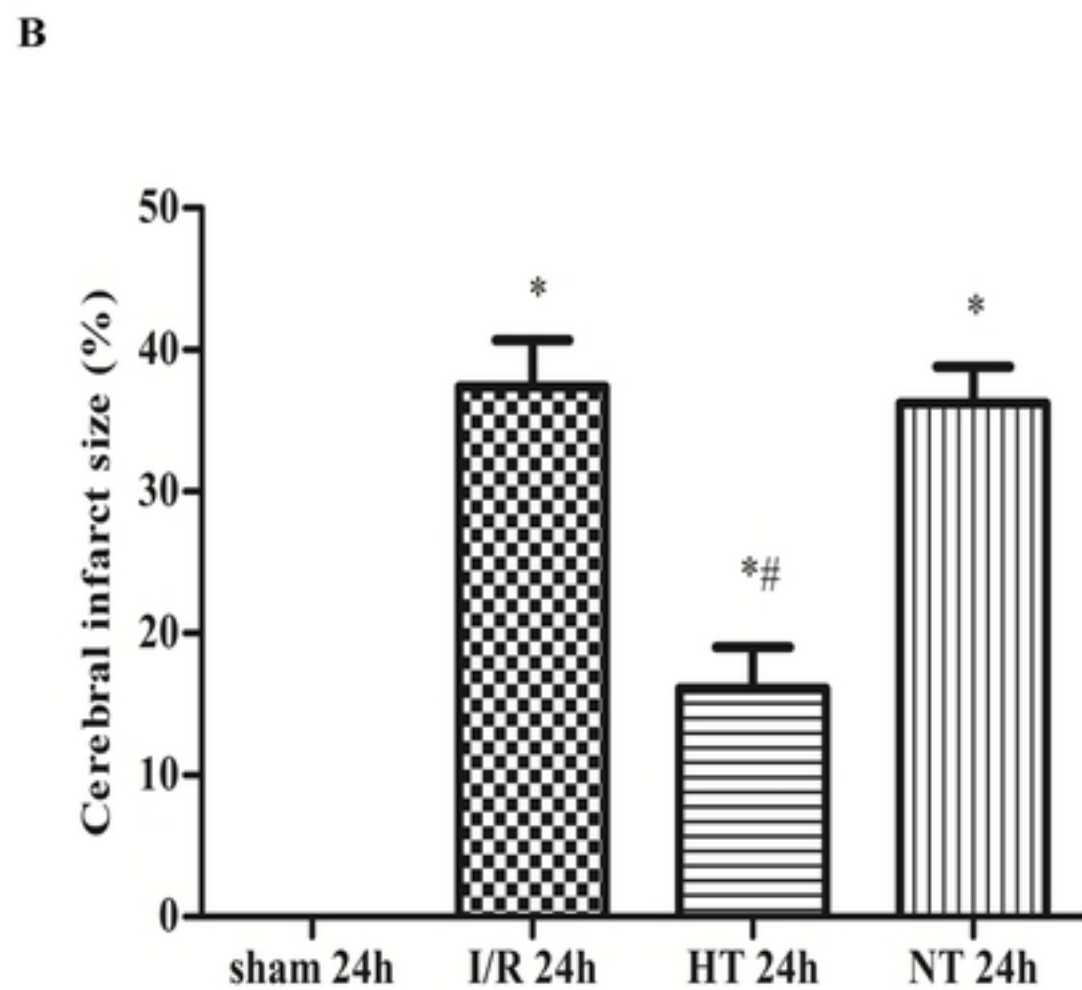

Figure



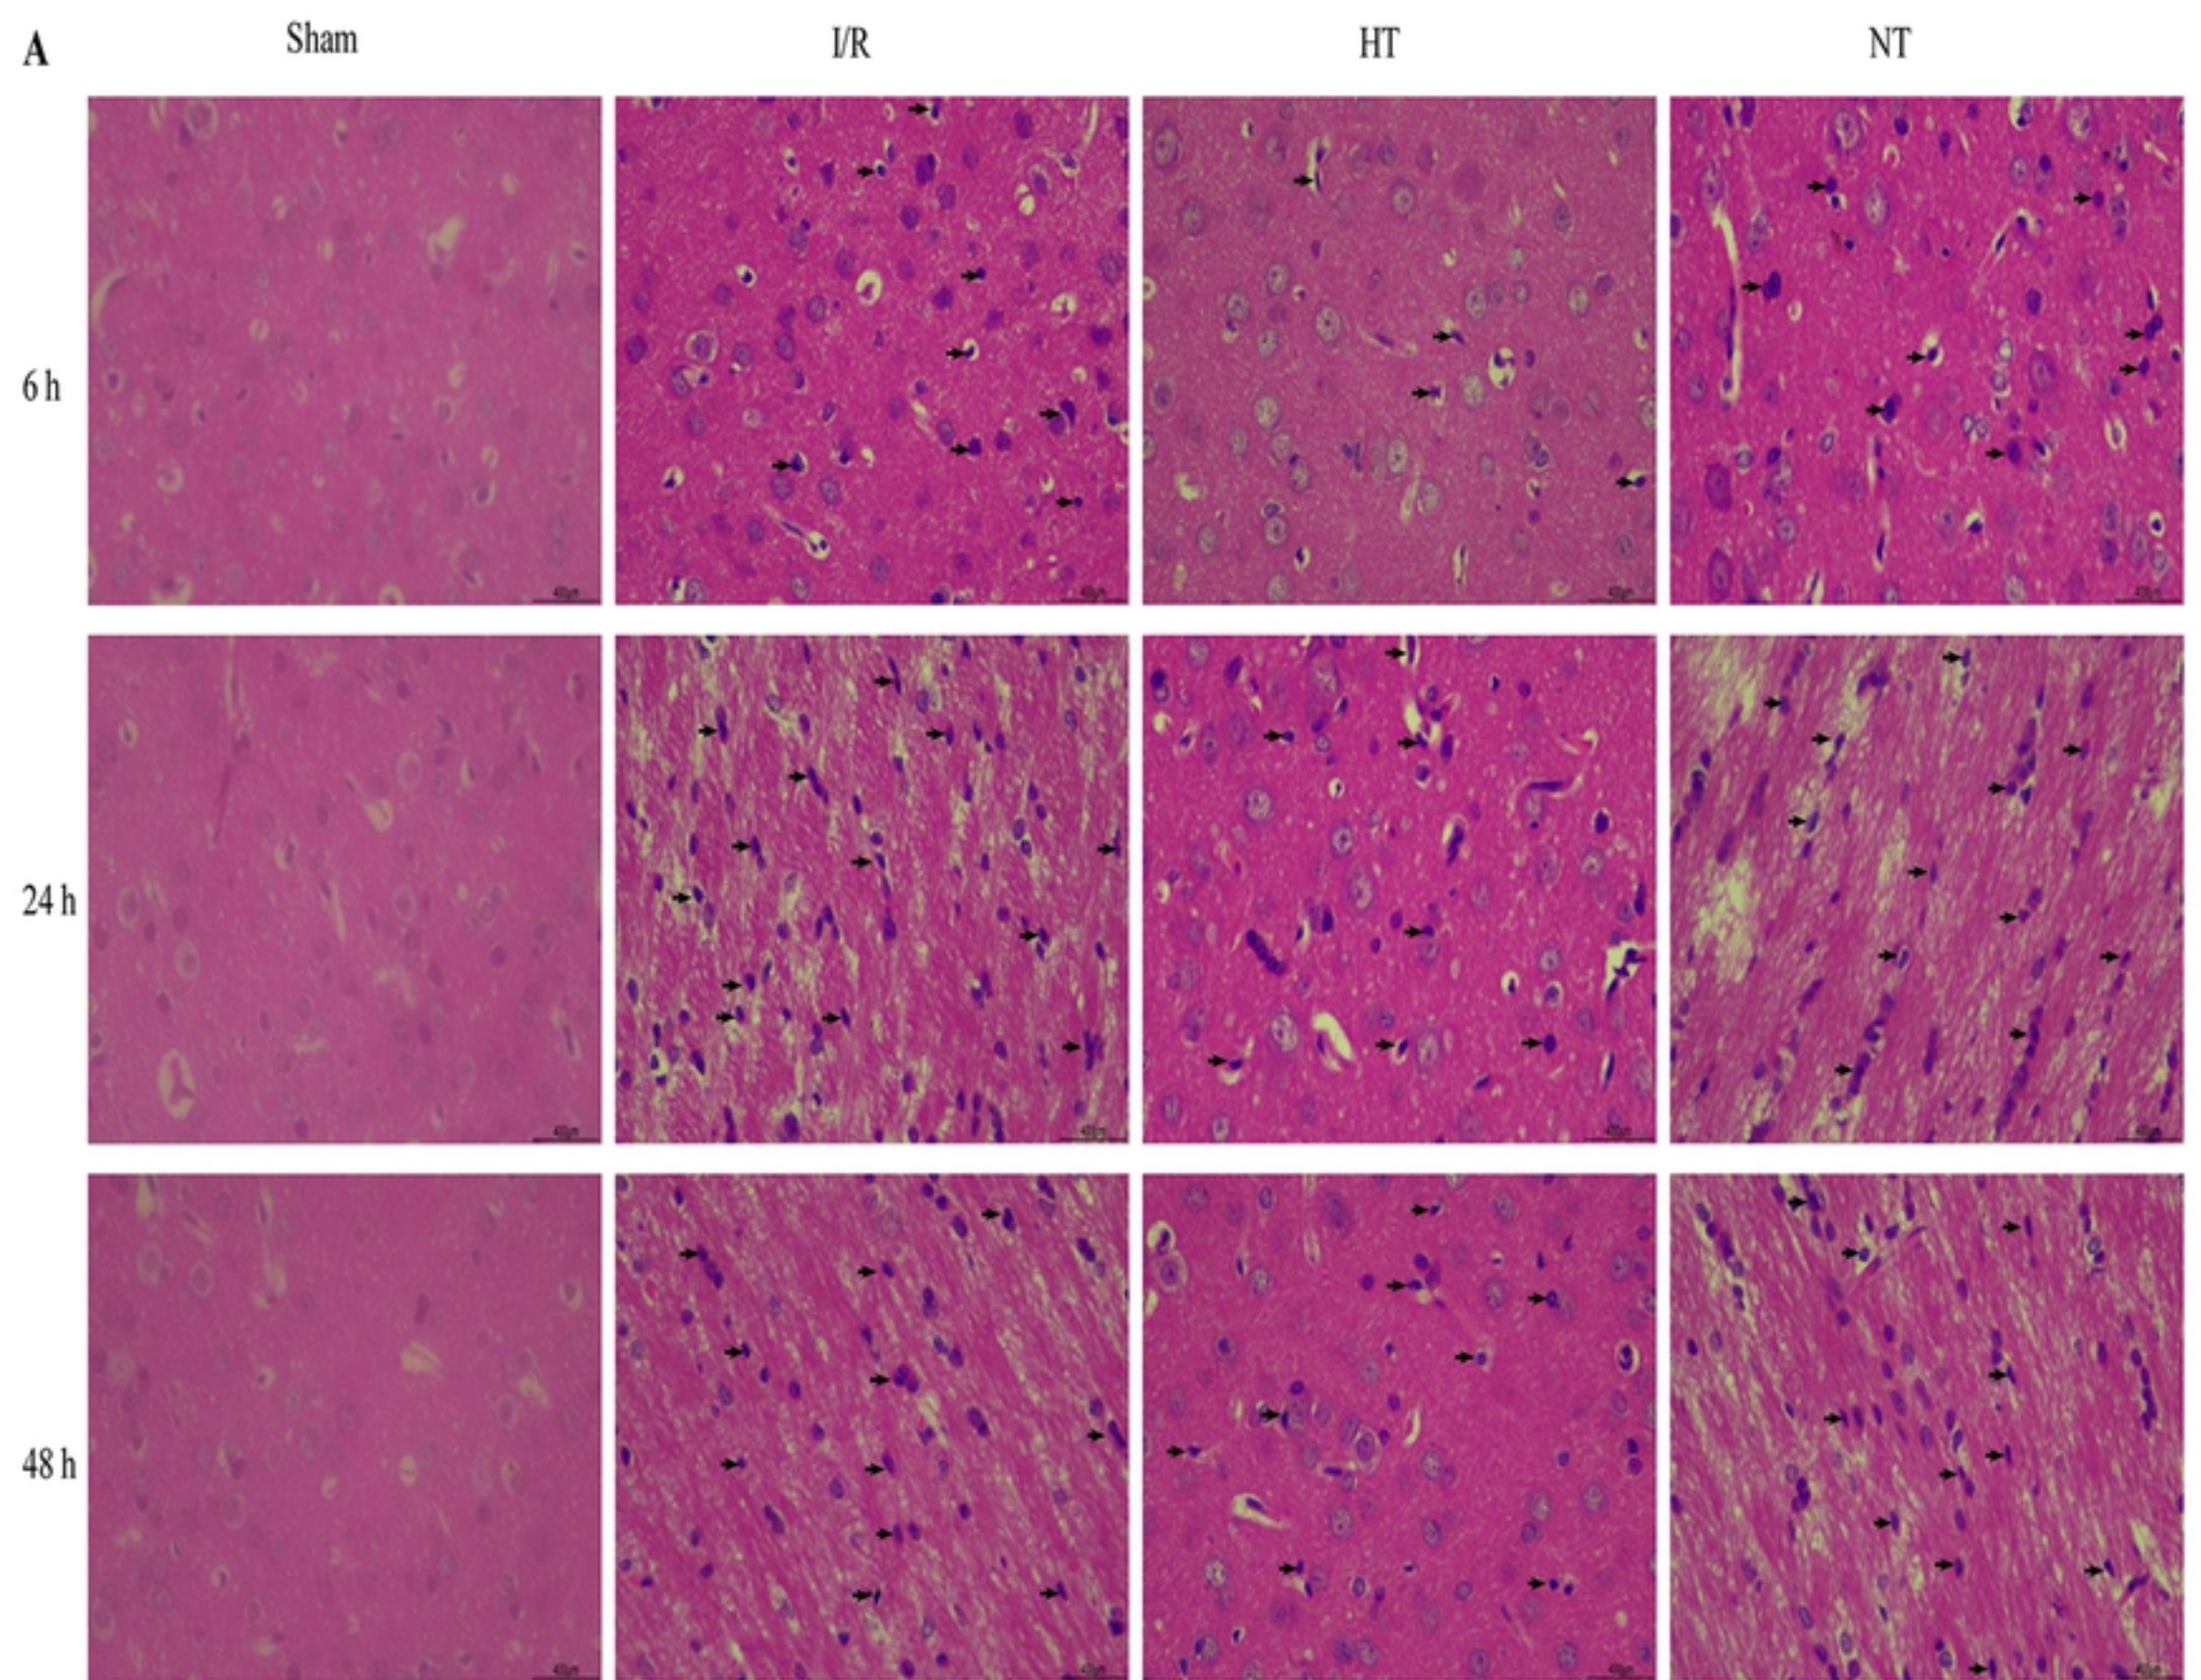

Figure



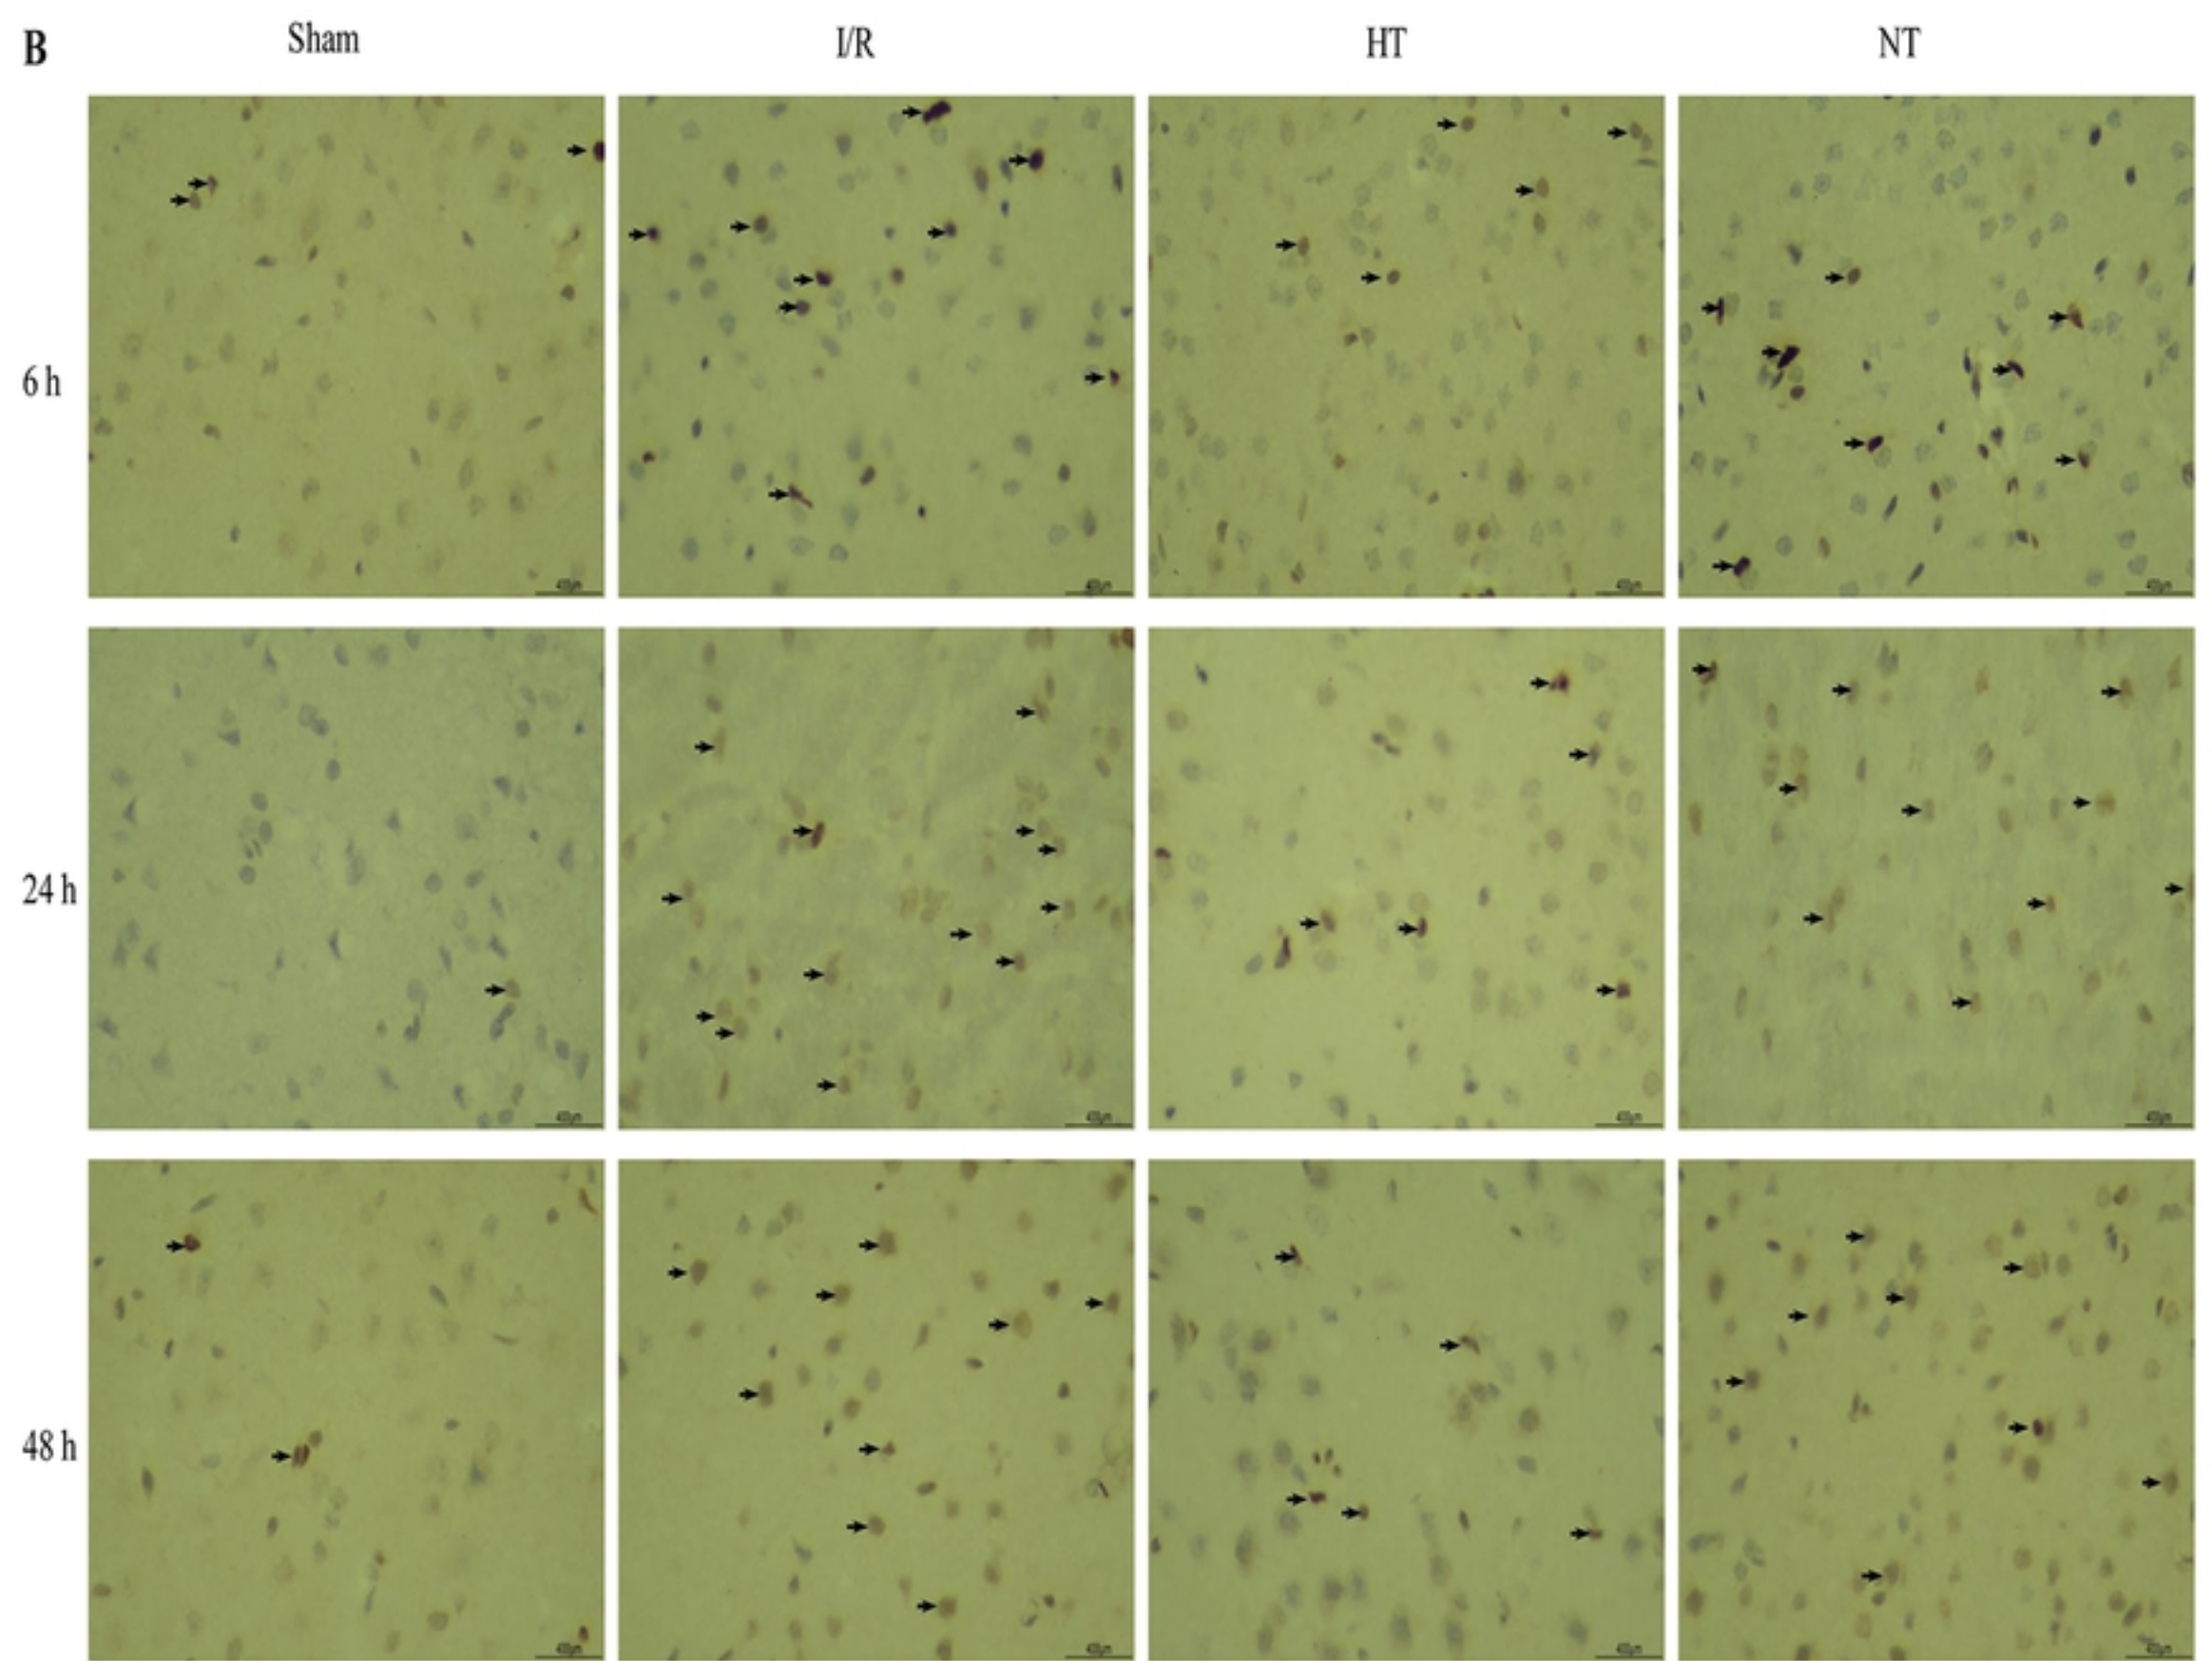

Figure

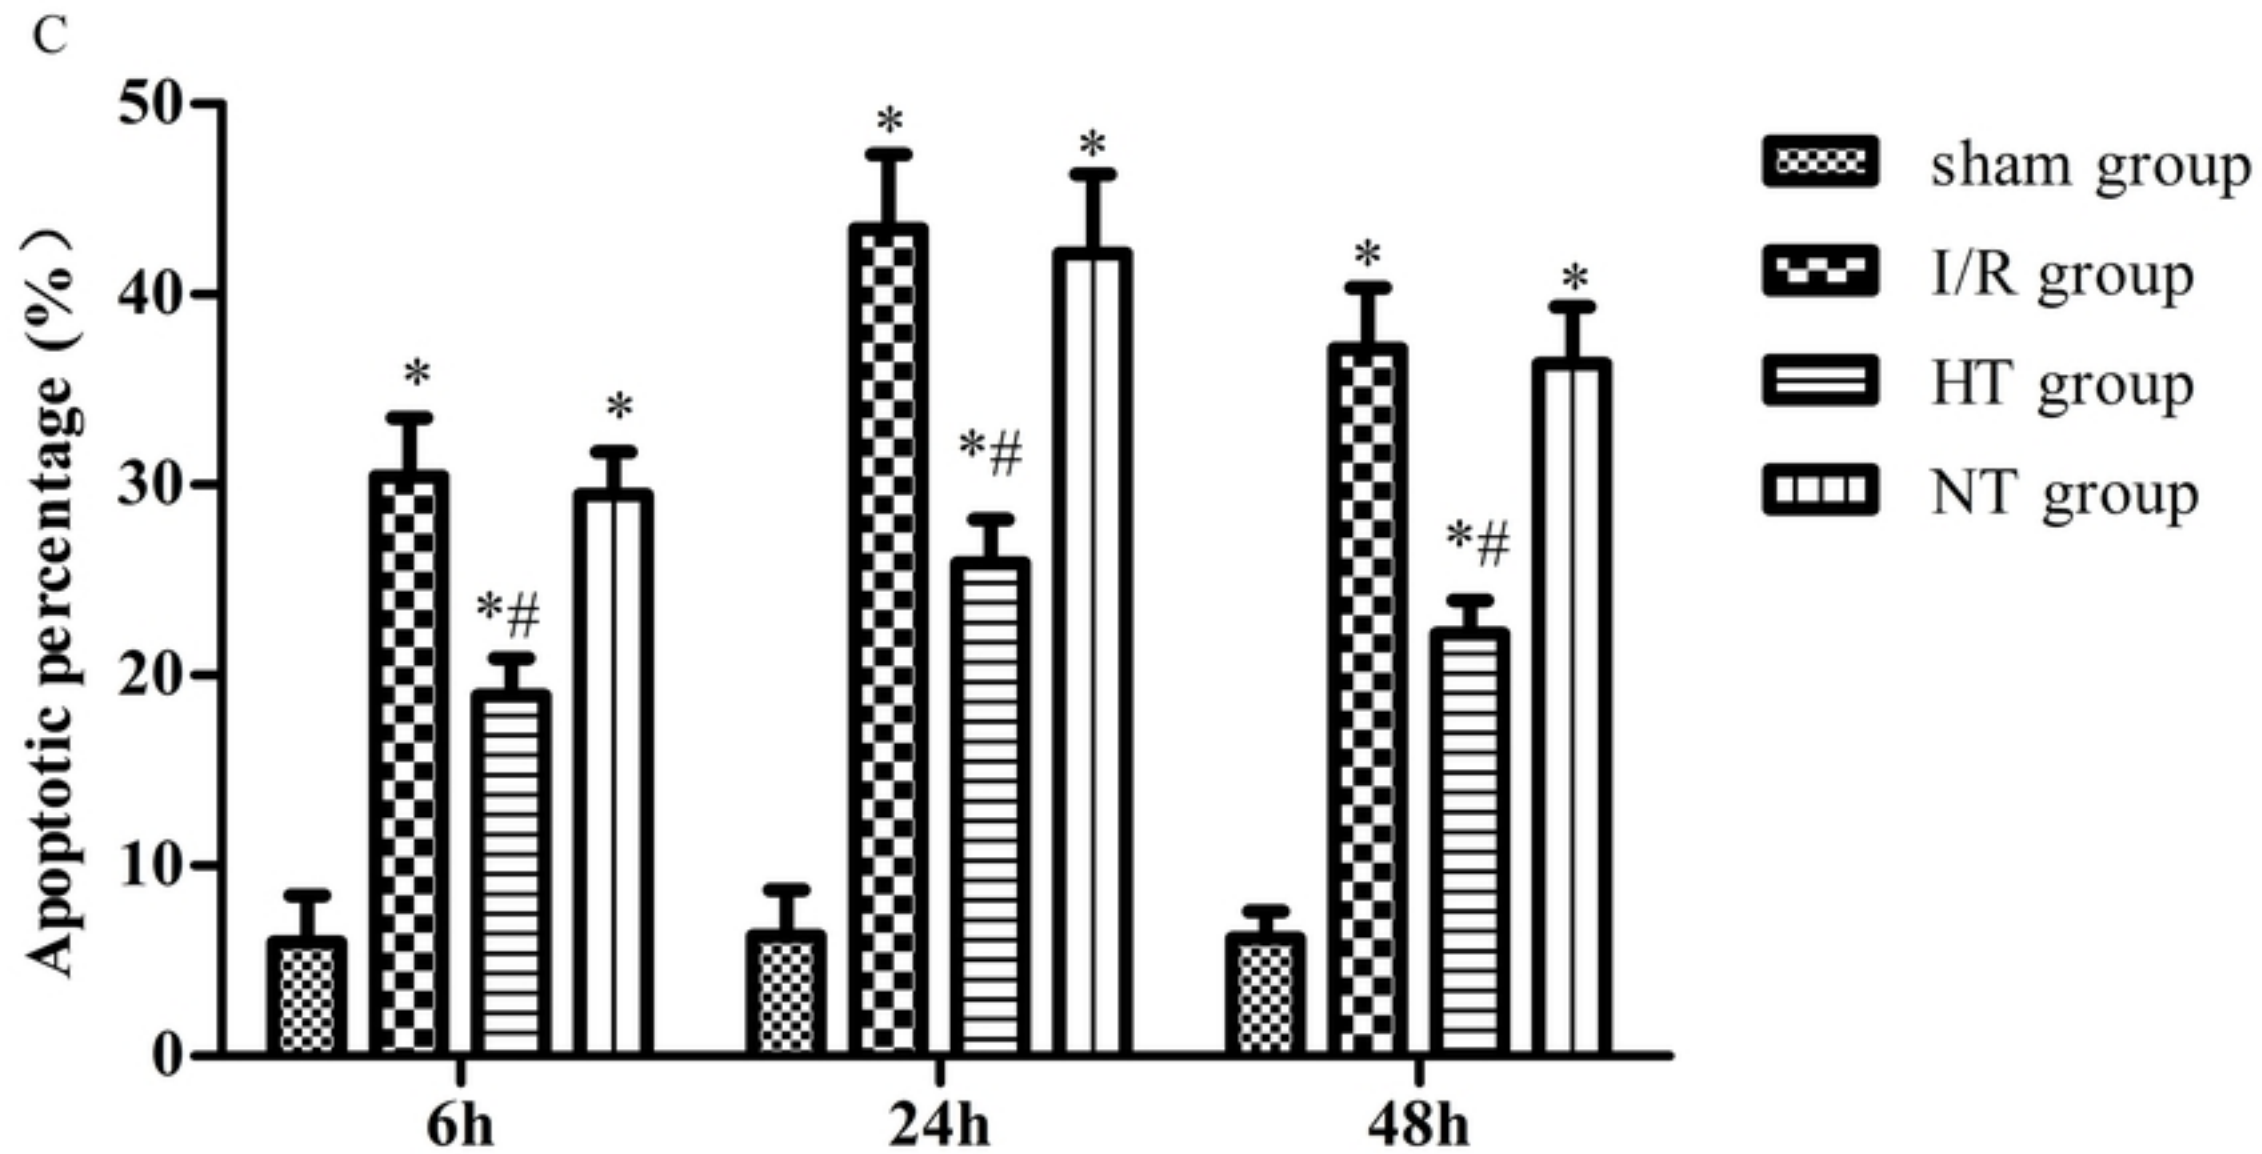

Figure

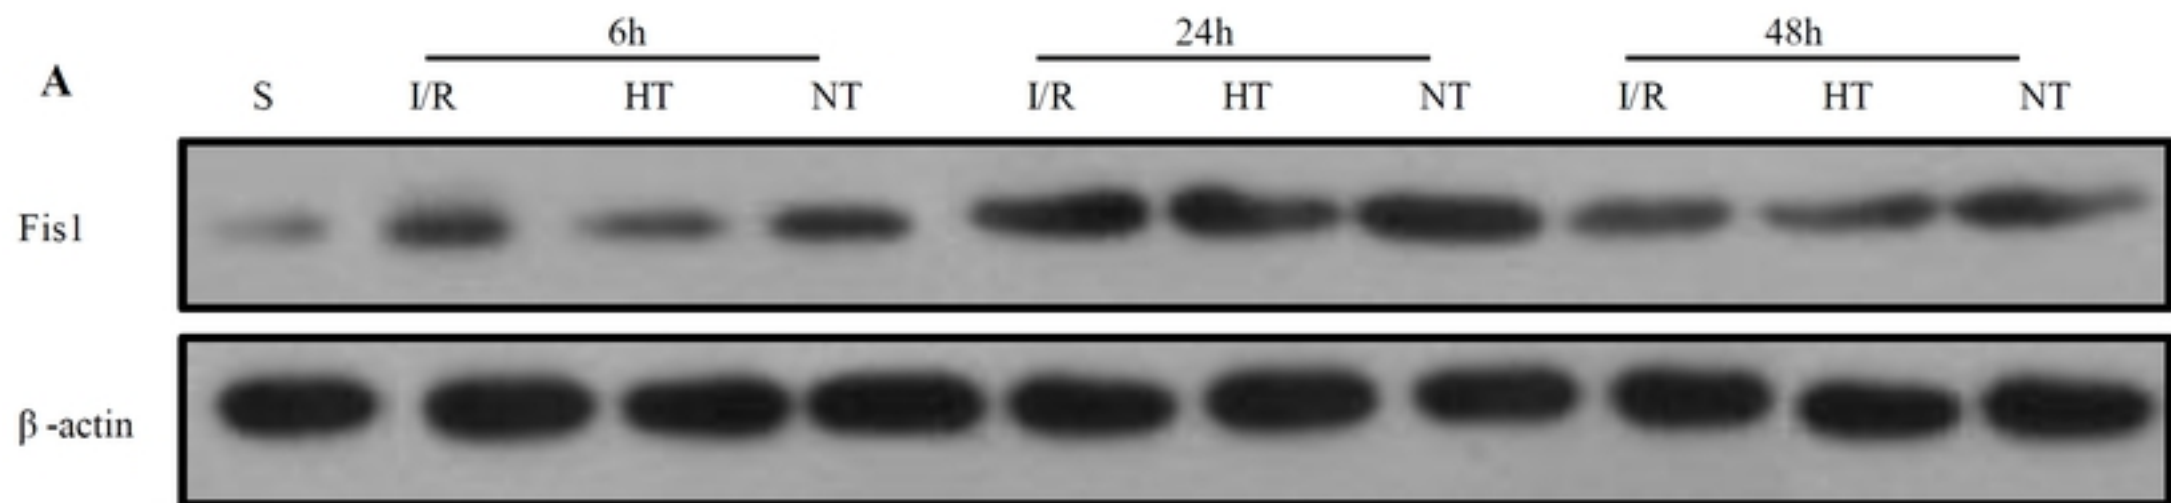

**B**

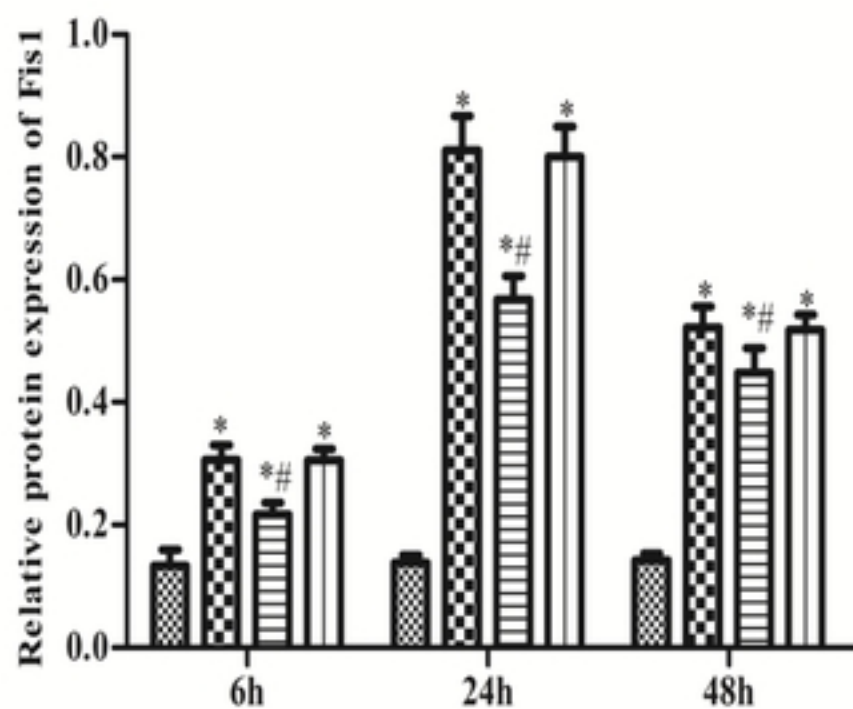

**C**

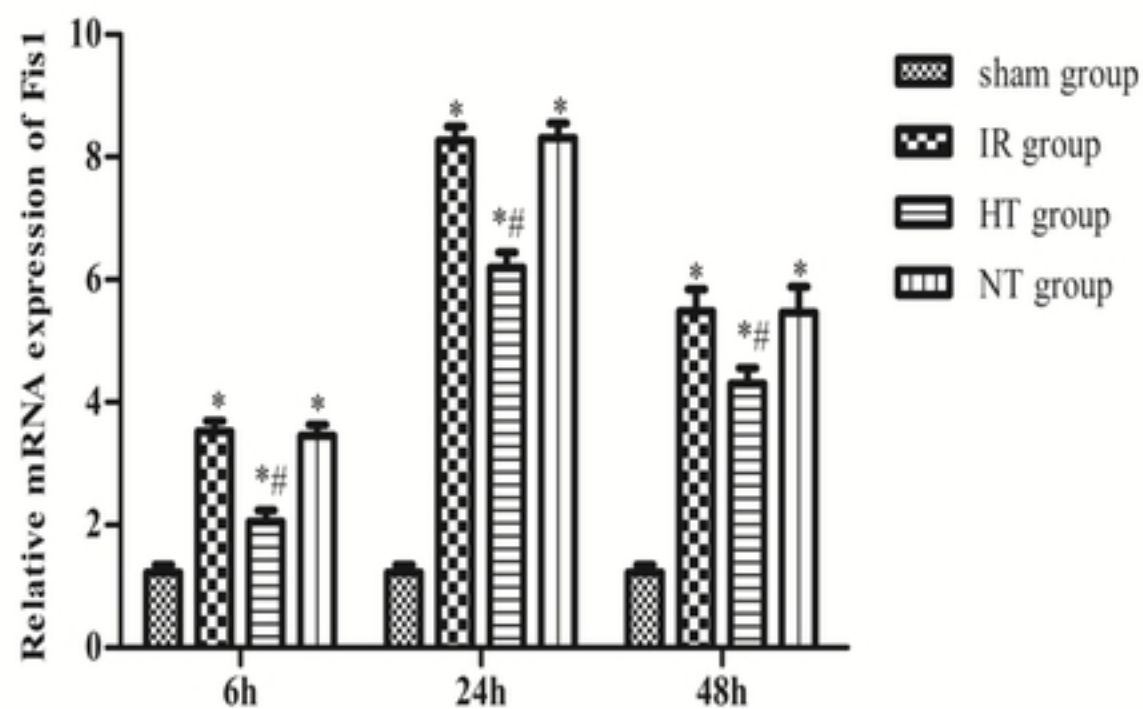

Figure

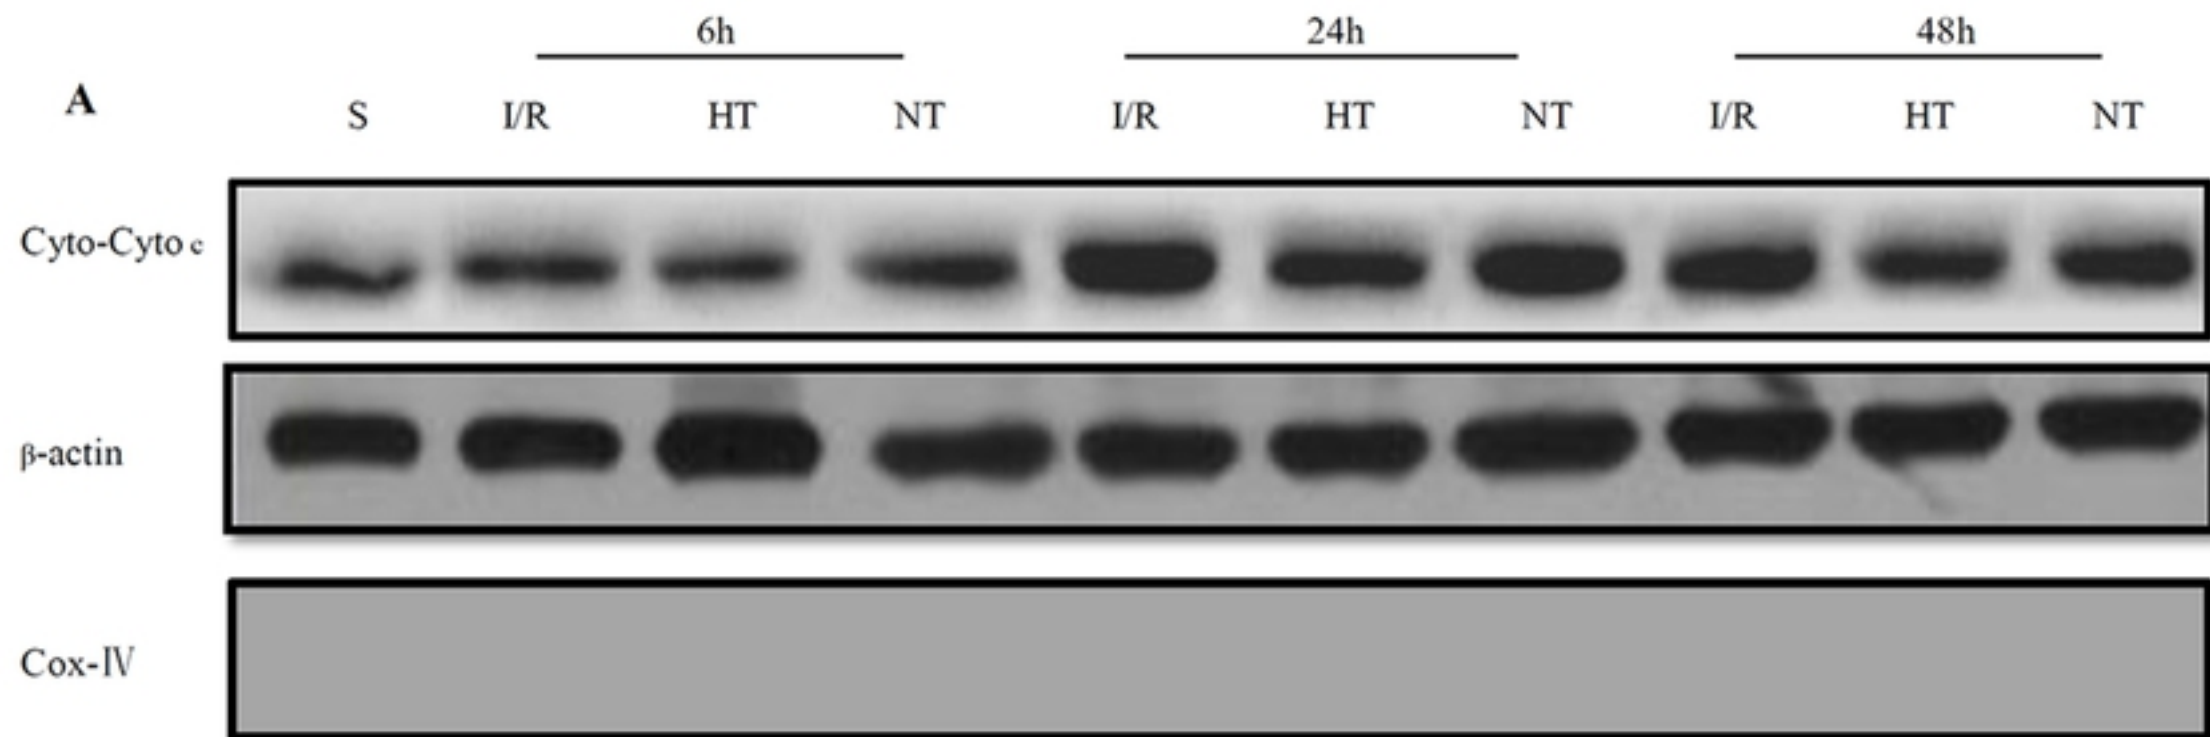

**B**

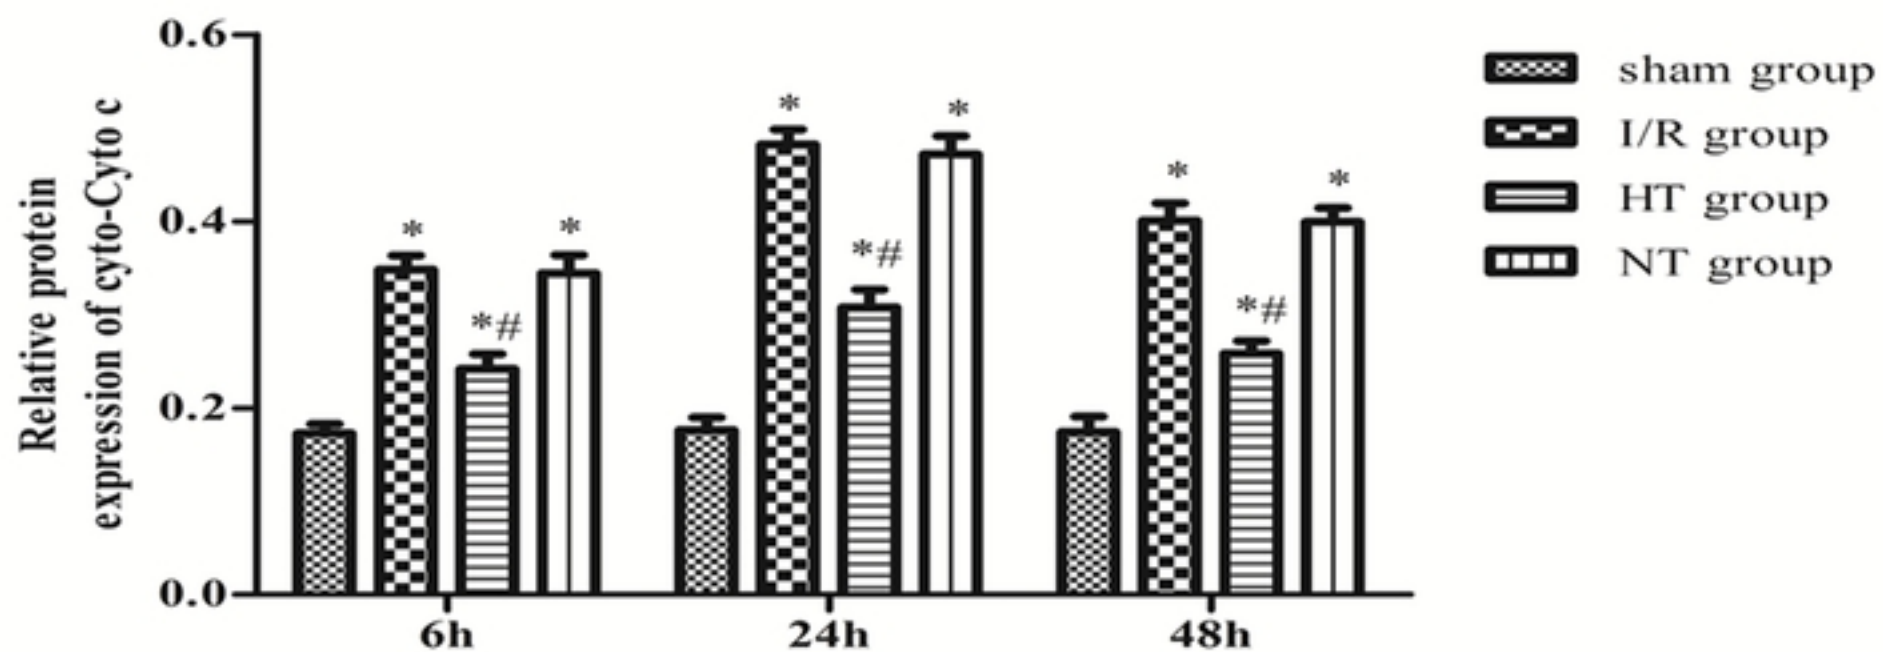

Figure



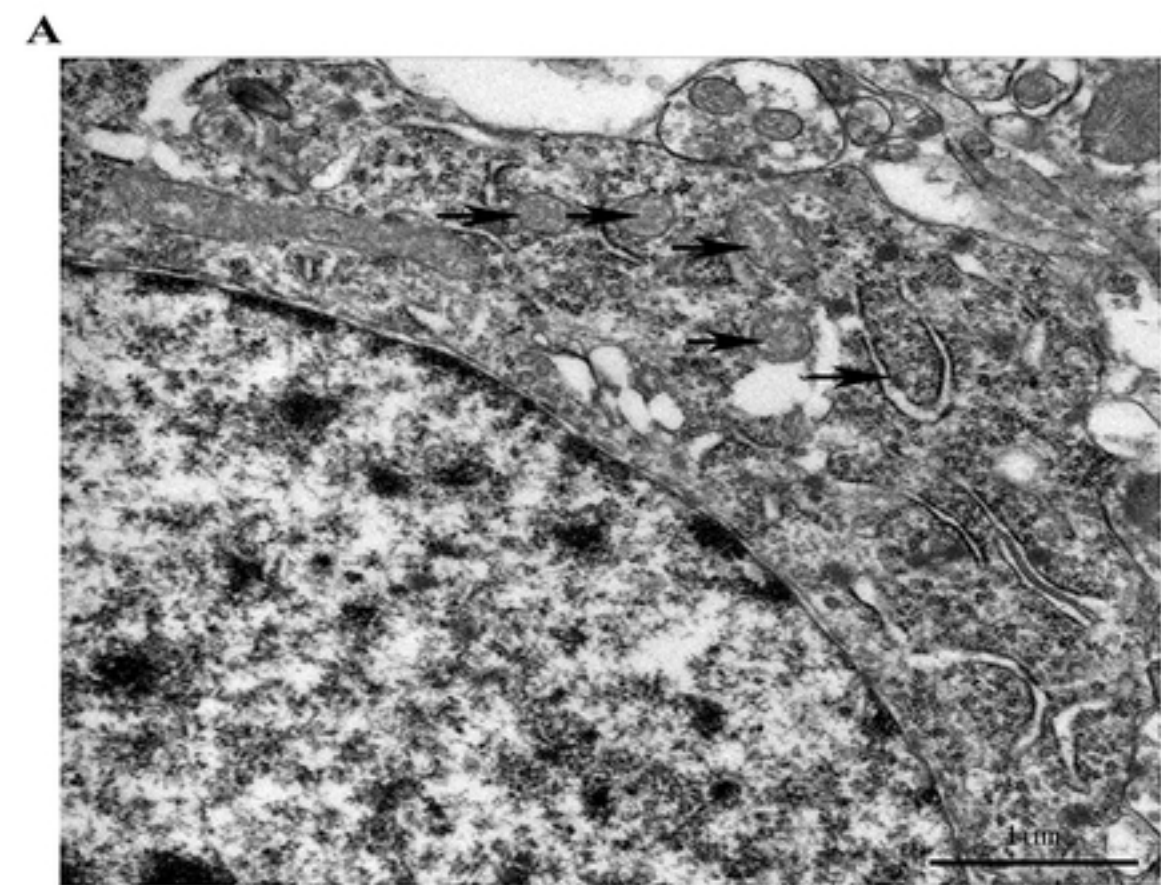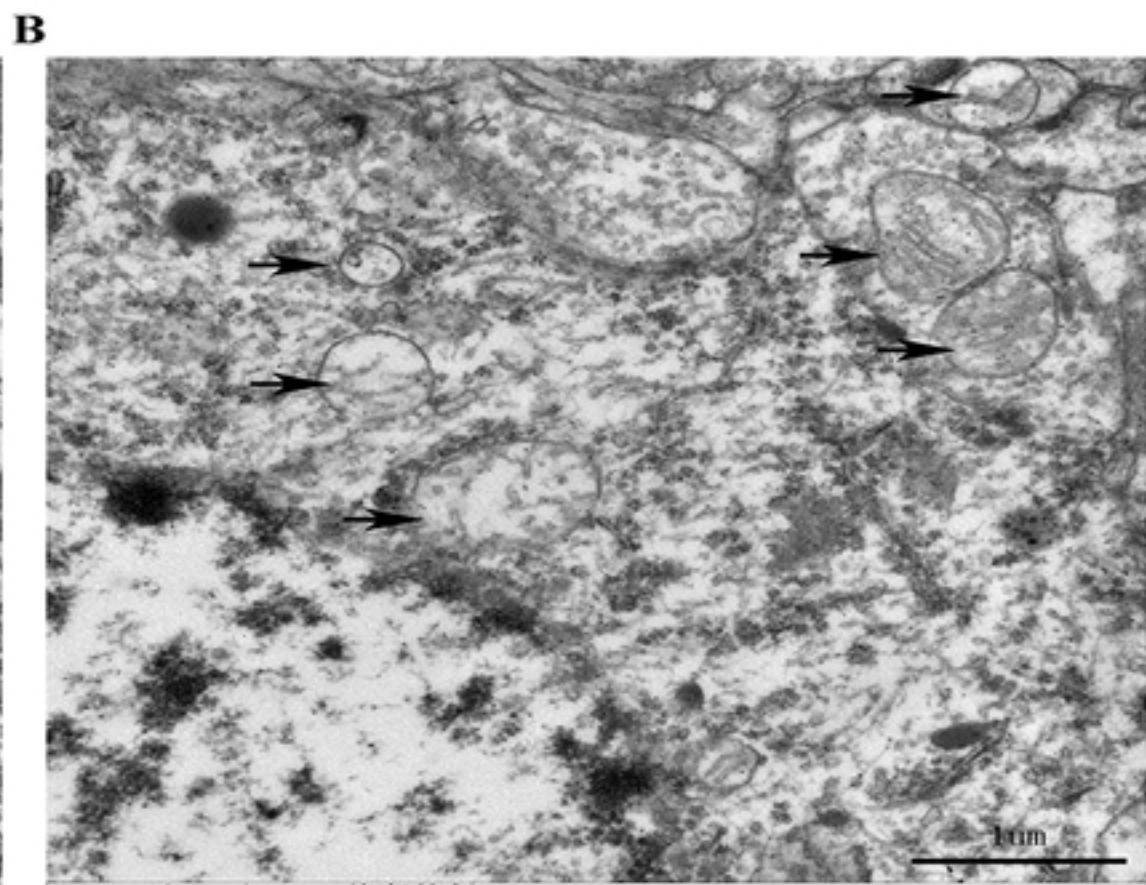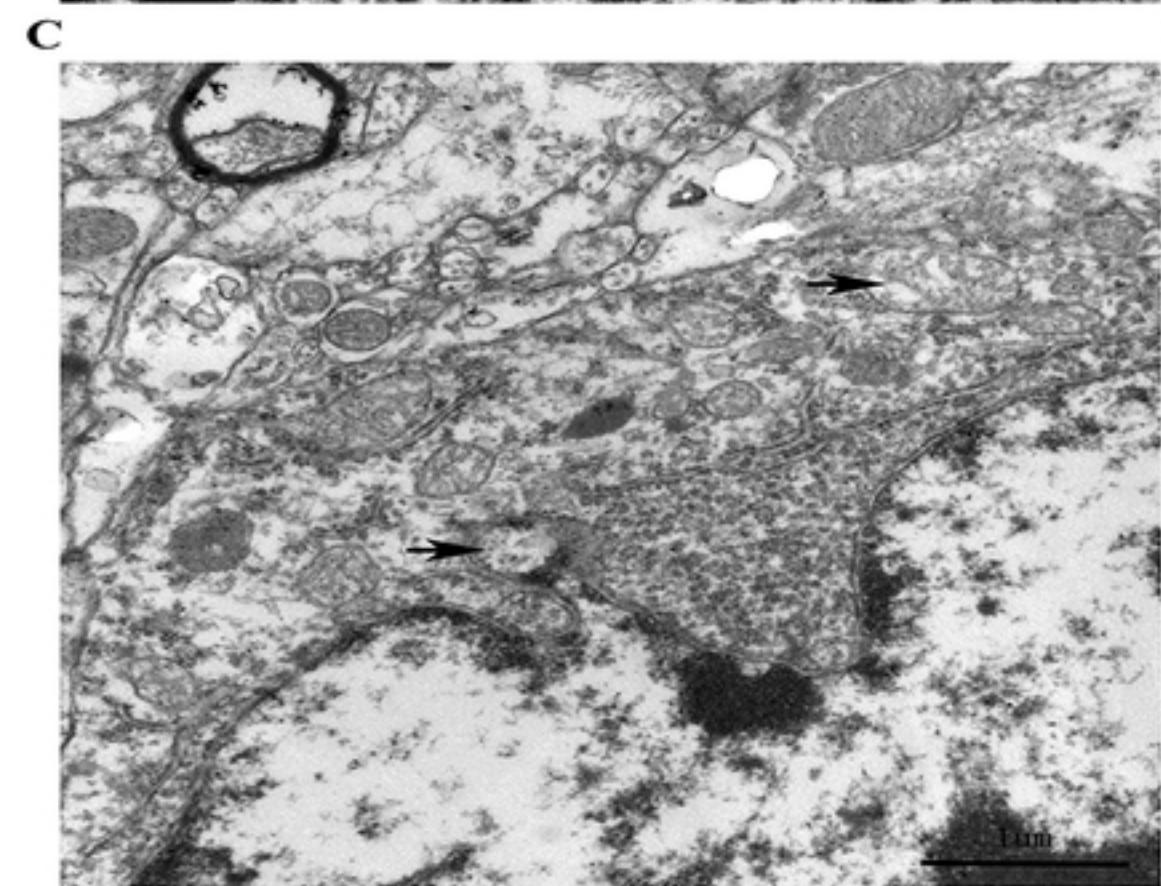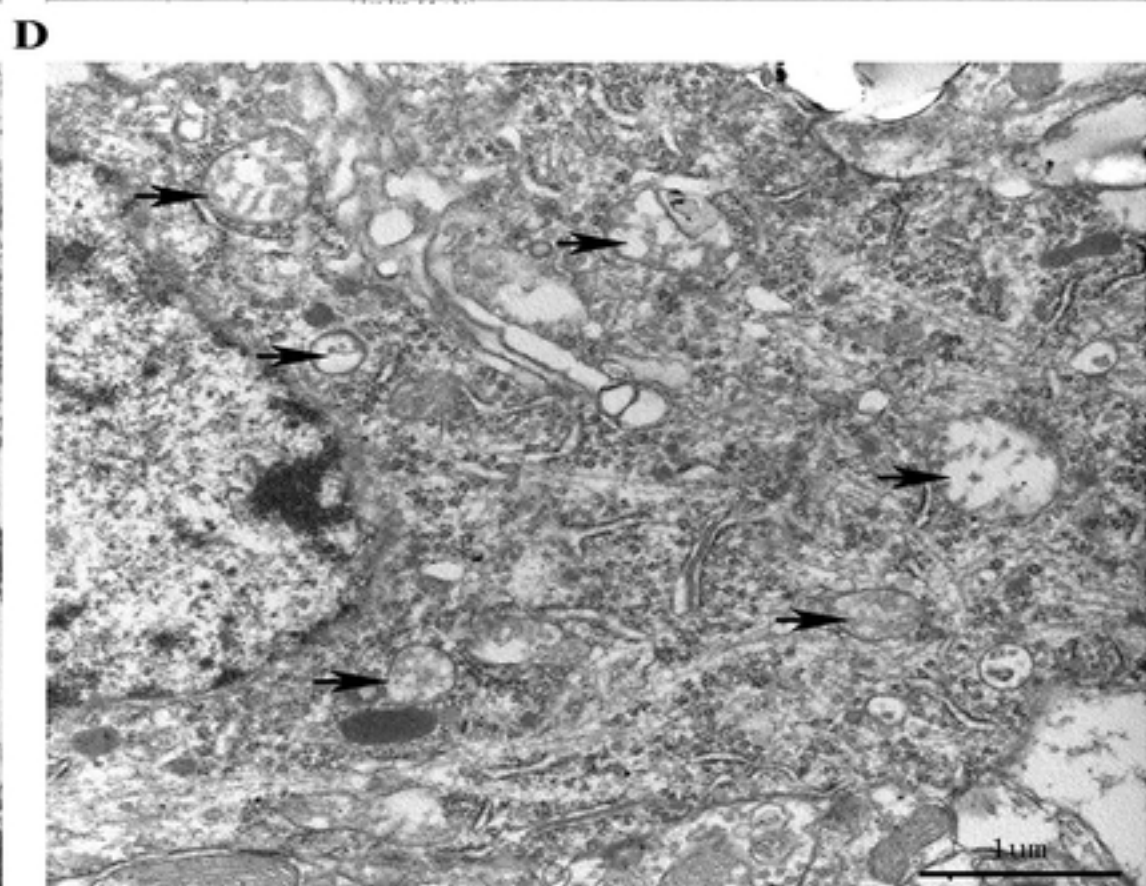

Figure
